# Supplementary material
Source: publisher figshare collection journal article supplement (https://tandf.figshare.com/articles/dataset/_/11761056)

# Mouse Liver

## Female

| Log |      |                               | Average | 95% CI |       |
|-----|------|-------------------------------|---------|--------|-------|
|     | Vmax | $\mu\text{mol/hr/mg protein}$ | -2.22   | -2.41  | -2.03 |
|     | Km   | $\mu\text{mol/L}$             | -0.77   | -1.17  | -0.38 |

## Male

|      |                               |  | Average | 95% CI |       |
|------|-------------------------------|--|---------|--------|-------|
| Vmax | $\mu\text{mol/hr/mg protein}$ |  | -1.47   | -1.53  | -1.41 |
| Km   | $\mu\text{mol/L}$             |  | -0.49   | -0.62  | -0.37 |

## Female

| EXP |      |                               | Average | 95% CI |      |
|-----|------|-------------------------------|---------|--------|------|
|     | Vmax | $\mu\text{mol/hr/mg protein}$ | 0.108   | 0.090  | 0.13 |
|     | Km   | $\mu\text{mol/L}$             | 0.46    | 0.31   | 0.69 |

## Male

|      |                               |  | Average | 95% CI |      |
|------|-------------------------------|--|---------|--------|------|
| Vmax | $\mu\text{mol/hr/mg protein}$ |  | 0.23    | 0.22   | 0.24 |
| Km   | $\mu\text{mol/L}$             |  | 0.61    | 0.54   | 0.69 |

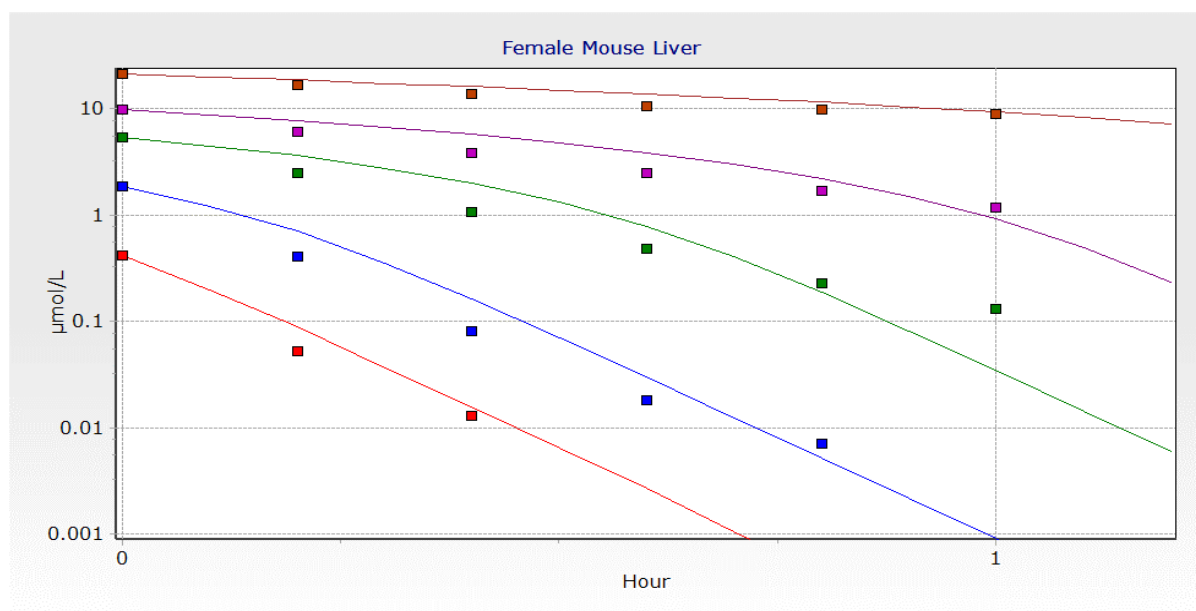

# Mouse Liver

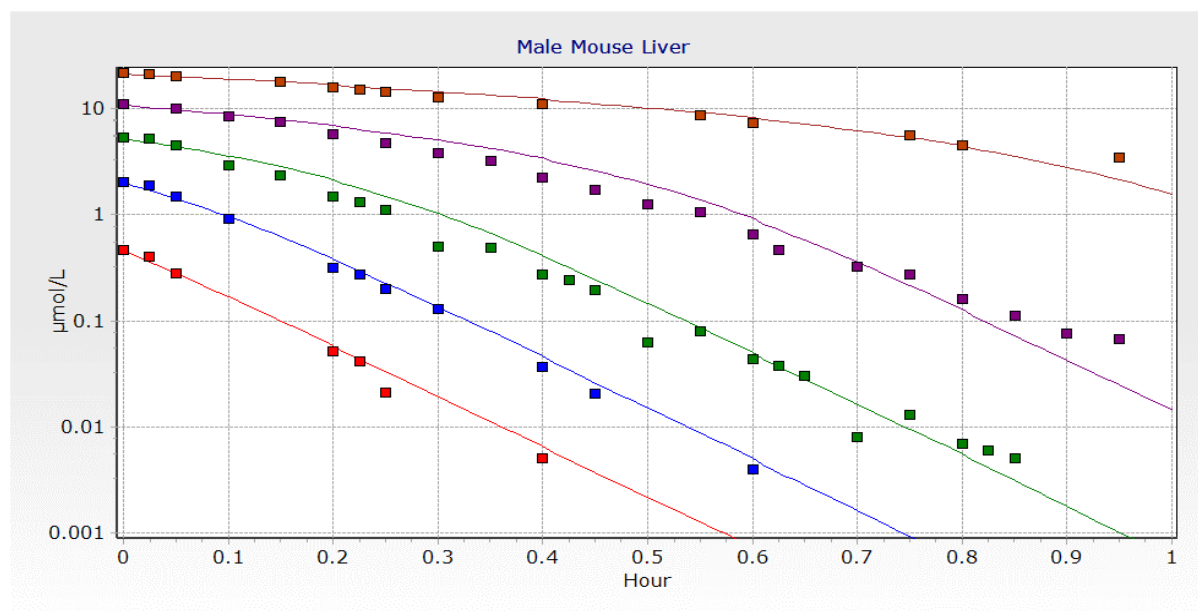

**Female** gelman.diag(x, autoburnin=FALSE)  
Potential scale reduction factors:

|            | Point est. | Upper CI |
|------------|------------|----------|
| Likelihood | 1          | 1        |
| Vmax       | 1          | 1        |
| Km         | 1          | 1        |

Multivariate psrf

1

>

> summary(x1)

Iterations = 1:10000  
Thinning interval = 1  
Number of chains = 1  
Sample size per chain = 10000

1 Empirical mean and standard deviation for each variable  
plus standard error of the mean:

|            | Mean    | SD      | Naive    | SE       | Time-series | SE |
|------------|---------|---------|----------|----------|-------------|----|
| Likelihood | 0.4676  | 0.07259 | 0.000726 | 0.001322 |             |    |
| Vmax       | -2.2249 | 0.09873 | 0.000987 | 0.005343 |             |    |
| Km         | -0.7689 | 0.20406 | 0.002041 | 0.010945 |             |    |

2 Quantiles for each variable:

|            | 2.50%   | 25%     | 50%     | 75%     | 97.50%  |
|------------|---------|---------|---------|---------|---------|
| Likelihood | 0.3498  | 0.4162  | 0.4581  | 0.5098  | 0.6349  |
| Vmax       | -2.4128 | -2.2913 | -2.2245 | -2.1606 | -2.0291 |
| Km         | -1.1709 | -0.9033 | -0.7703 | -0.6328 | -0.3762 |

> summary(x2)

Iterations = 1:10000  
Thinning interval = 1  
Number of chains = 1  
Sample size per chain = 10000

1 Empirical mean and standard deviation for each variable  
plus standard error of the mean:

# Mouse Liver

|            | Mean    | SD      | Naive    | SE       | Time-serie SE |
|------------|---------|---------|----------|----------|---------------|
| Likelihood | 0.4657  | 0.07228 | 0.000723 | 0.001437 |               |
| Vmax       | -2.227  | 0.09753 | 0.000975 | 0.005162 |               |
| Km         | -0.7733 | 0.20047 | 0.002005 | 0.010622 |               |

2 Quantiles for each variable:

|            | 2.50%   | 25%     | 50%     | 75%     | 97.50%  |
|------------|---------|---------|---------|---------|---------|
| Likelihood | 0.3515  | 0.4148  | 0.4565  | 0.5075  | 0.6288  |
| Vmax       | -2.4147 | -2.2905 | -2.2276 | -2.1648 | -2.0289 |
| Km         | -1.166  | -0.9031 | -0.7744 | -0.6474 | -0.3813 |

> summary(x3)

```

Iterations = 1:10000
Thinning interval = 1
Number of chains = 1
Sample size per chain = 10000

```

1 Empirical mean and standard deviation for each variable  
plus standard error of the mean:

|            | Mean    | SD      | Naive    | SE       | Time-serie SE |
|------------|---------|---------|----------|----------|---------------|
| Likelihood | 0.4668  | 0.07275 | 0.000728 | 0.001521 |               |
| Vmax       | -2.221  | 0.09732 | 0.000973 | 0.005156 |               |
| Km         | -0.7599 | 0.19733 | 0.001973 | 0.010606 |               |

2 Quantiles for each variable:

|            | 2.50%  | 25%     | 50%     | 75%    | 97.50%  |
|------------|--------|---------|---------|--------|---------|
| Likelihood | 0.351  | 0.4156  | 0.458   | 0.5072 | 0.6381  |
| Vmax       | -2.412 | -2.2834 | -2.2215 | -2.157 | -2.0344 |
| Km         | -1.151 | -0.8899 | -0.7583 | -0.628 | -0.3843 |

**Male**

gelman.diag(x, autoburnin=FALSE)  
Potential scale reduction factors:

|            | Point est. | Upper CI |
|------------|------------|----------|
| Likelihood | 1          | 1        |
| Vmax       | 1          | 1        |
| Km         | 1          | 1        |

Multivariate psrf

1

>

> summary(x1)

|            |                  |         |
|------------|------------------|---------|
| Iterations | =                | 1:10000 |
| Thinning   | interval =       | 1       |
| Number     | of chains =      | 1       |
| Sample     | size per chain = | 10000   |

1 Empirical mean and standard deviation for each variable  
plus standard error of the mean:

|            | Mean    | SD      | Naive    | SE       | Time-series SE |
|------------|---------|---------|----------|----------|----------------|
| Likelihood | 0.3093  | 0.02639 | 0.000264 | 0.000432 |                |
| Vmax       | -1.4697 | 0.0292  | 0.000292 | 0.00148  |                |
| Km         | -0.4912 | 0.06384 | 0.000638 | 0.003181 |                |

2 Quantiles for each variable:

|            | 2.50%   | 25%     | 50%     | 75%     | 97.50%  |
|------------|---------|---------|---------|---------|---------|
| Likelihood | 0.2623  | 0.2911  | 0.3076  | 0.3263  | 0.3645  |
| Vmax       | -1.5259 | -1.4889 | -1.4695 | -1.4495 | -1.4137 |
| Km         | -0.6175 | -0.5338 | -0.4903 | -0.4478 | -0.3681 |

> summary(x2)

|            |                  |         |
|------------|------------------|---------|
| Iterations | =                | 1:10000 |
| Thinning   | interval =       | 1       |
| Number     | of chains =      | 1       |
| Sample     | size per chain = | 10000   |

1 Empirical mean and standard deviation for each variable  
plus standard error of the mean:

# Mouse Liver

|            | Mean    | SD      | Naive    | SE       | Time-series SE |
|------------|---------|---------|----------|----------|----------------|
| Likelihood | 0.3089  | 0.02592 | 0.000259 | 0.000423 |                |
| Vmax       | -1.4696 | 0.0313  | 0.000313 | 0.001734 |                |
| Km         | -0.4911 | 0.06778 | 0.000678 | 0.003782 |                |

2 Quantiles for each variable:

|            | 2.50%   | 25%     | 50%     | 75%     | 97.50%  |
|------------|---------|---------|---------|---------|---------|
| Likelihood | 0.2648  | 0.2902  | 0.3073  | 0.3248  | 0.3647  |
| Vmax       | -1.5289 | -1.4901 | -1.4712 | -1.4491 | -1.4054 |
| Km         | -0.6202 | -0.535  | -0.4942 | -0.4463 | -0.3491 |

> summary(x3)

```

Iterations = 1:10000
Thinning interval = 1
Number of chains = 1
Sample size per chain = 10000

```

1 Empirical mean and standard deviation for each variable  
plus standard error of the mean:

|            | Mean    | SD      | Naive    | SE       | Time-series SE |
|------------|---------|---------|----------|----------|----------------|
| Likelihood | 0.3088  | 0.02604 | 0.00026  | 0.000427 |                |
| Vmax       | -1.4675 | 0.02963 | 0.000296 | 0.001581 |                |
| Km         | -0.487  | 0.06418 | 0.000642 | 0.003413 |                |

2 Quantiles for each variable:

|            | 2.50%   | 25%    | 50%     | 75%     | 97.50%  |
|------------|---------|--------|---------|---------|---------|
| Likelihood | 0.2637  | 0.29   | 0.3076  | 0.3253  | 0.3639  |
| Vmax       | -1.5278 | -1.487 | -1.4681 | -1.4477 | -1.4101 |
| Km         | -0.6179 | -0.527 | -0.4878 | -0.4446 | -0.3608 |

Mouse Lung

|     |        |                   |         |        |       |
|-----|--------|-------------------|---------|--------|-------|
| Log | Female |                   |         |        |       |
|     |        |                   | Average | 95% CI |       |
|     | Vmax   | μmol/hr/mg protei | -3.58   | -3.91  | -3.25 |
|     | Km     | μmol/L            | 1.07    | 0.69   | 1.44  |

|      |                   |       |         |        |
|------|-------------------|-------|---------|--------|
| Male |                   |       |         |        |
|      |                   |       | Average | 95% CI |
| Vmax | μmol/hr/mg protei | -2.03 | -2.14   | -1.90  |
| Km   | μmol/L            | 0.54  | 0.41    | 0.70   |

|     |        |                   |         |        |       |
|-----|--------|-------------------|---------|--------|-------|
| EXP | Female |                   |         |        |       |
|     |        |                   | Average | 95% CI |       |
|     | Vmax   | μmol/hr/mg protei | 0.028   | 0.020  | 0.039 |
|     | Km     | μmol/L            | 2.91    | 1.99   | 4.24  |

|      |                   |      |         |        |
|------|-------------------|------|---------|--------|
| Male |                   |      |         |        |
|      |                   |      | Average | 95% CI |
| Vmax | μmol/hr/mg protei | 0.13 | 0.12    | 0.15   |
| Km   | μmol/L            | 1.72 | 1.51    | 2.02   |

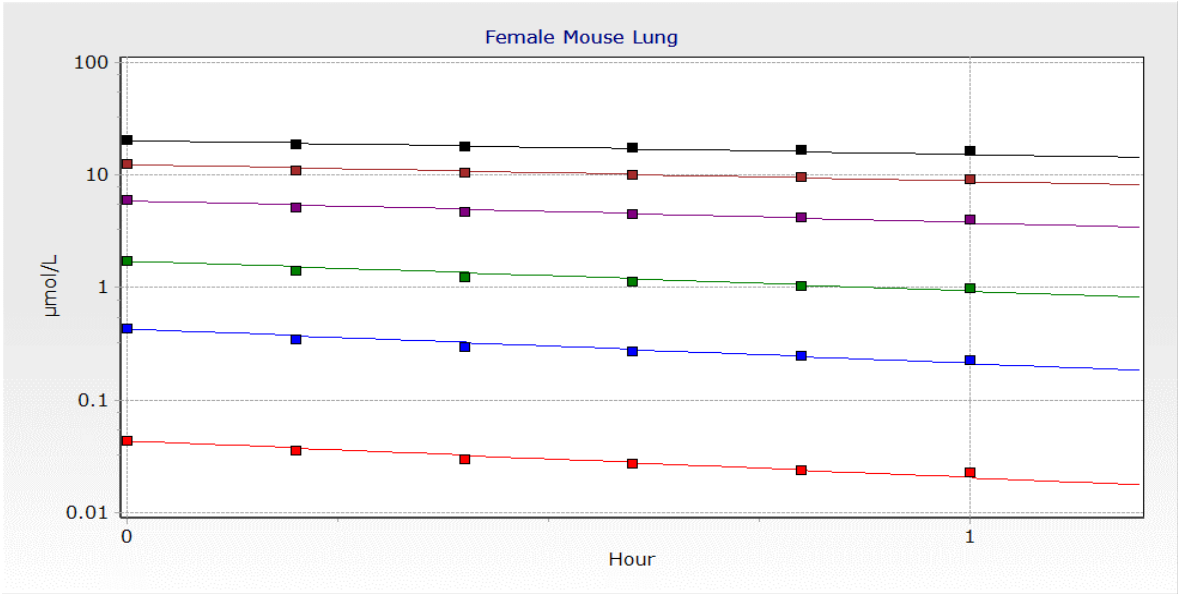

# Mouse Lung

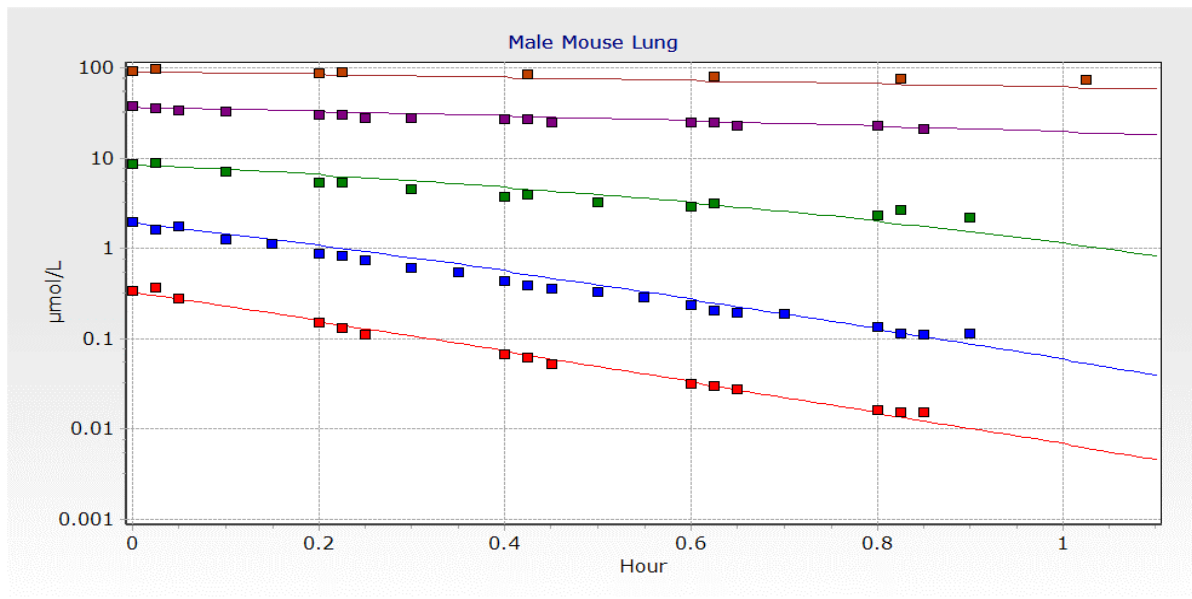



# Mouse Lung

Female gelman.diag(x, autoburnin=FALSE)  
Potential scale reduction factors:

|            | Point est. | Upper CI |
|------------|------------|----------|
| Likelihood | 1          | 1        |
| Vmax       | 1.02       | 1.06     |
| Km         | 1.02       | 1.06     |

Multivariate psrf

1.02

>

> summary(x1)

Iterations = 1:10000  
Thinning interval = 1  
Number of chains = 1  
Sample size per chain = 10000

1 Empirical mean and standard deviation for each variable  
plus standard error of the mean:

|            | Mean     | SD       | Naive SE | Time-series SE |
|------------|----------|----------|----------|----------------|
| Likelihood | 0.05712  | 0.007288 | 7.29E-05 | 1.26E-04       |
| Vmax       | -3.57856 | 0.167052 | 1.67E-03 | 1.50E-02       |
| Km         | 1.06718  | 0.192112 | 1.92E-03 | 1.75E-02       |

2 Quantiles for each variable:

|            | 2.50%    | 25%      | 50%     | 75%      | 97.50%   |
|------------|----------|----------|---------|----------|----------|
| Likelihood | 0.04514  | 0.05201  | 0.0564  | 6.13E-02 | 7.34E-02 |
| Vmax       | -3.90942 | -3.69267 | -3.5756 | -3.46475 | -3.25309 |
| Km         | 0.68801  | 0.93497  | 1.0704  | 1.20E+00 | 1.44E+00 |

> summary(x2)

Iterations = 1:10000  
Thinning interval = 1  
Number of chains = 1  
Sample size per chain = 10000

1 Empirical mean and standard deviation for each variable  
plus standard error of the mean:

|            | Mean     | SD       | Naive SE | Time-series SE |
|------------|----------|----------|----------|----------------|
| Likelihood | 0.05717  | 0.007458 | 7.46E-05 | 1.32E-04       |
| Vmax       | -3.62744 | 0.153111 | 1.53E-03 | 1.22E-02       |

# Mouse Lung

Km 1.01099 0.176328 1.76E-03 1.39E-02

2 Quantiles for each variable:

|            | 2.50%    | 25%      | 50%     | 75%      | 97.50%   |
|------------|----------|----------|---------|----------|----------|
| Likelihood | 0.04506  | 0.05192  | 0.05639 | 0.06148  | 0.07407  |
| Vmax       | -3.91588 | -3.72782 | -3.6303 | -3.53244 | -3.30676 |
| Km         | 0.68354  | 0.8949   | 1.0068  | 1.12108  | 1.38889  |

> summary(x3)

|            |          |         |       |   |       |
|------------|----------|---------|-------|---|-------|
| Iterations | =        | 1:10000 |       |   |       |
| Thinning   | interval | =       | 1     |   |       |
| Number     | of       | chains  | =     | 1 |       |
| Sample     | size     | per     | chain | = | 10000 |

1 Empirical mean and standard deviation for each variable  
plus standard error of the mean:

|            | Mean     | SD       | Naive    | SE       | Time-series SE |
|------------|----------|----------|----------|----------|----------------|
| Likelihood | 0.05725  | 0.007307 | 7.31E-05 | 1.42E-04 |                |
| Vmax       | -3.58837 | 0.171506 | 1.72E-03 | 1.50E-02 |                |
| Km         | 1.05708  | 0.197345 | 1.97E-03 | 1.74E-02 |                |

2 Quantiles for each variable:

|            | 2.50%    | 25%      | 50%       | 75%      | 97.50%  |
|------------|----------|----------|-----------|----------|---------|
| Likelihood | 0.04502  | 0.05204  | 5.66E-02  | 0.06164  | 0.07368 |
| Vmax       | -3.94569 | -3.70485 | -3.58E+00 | -346.42% | -328%   |
| Km         | 0.64471  | 0.92227  | 1.06243   | 1.19907  | 1.42067 |

# Mouse Lung

Male      gelman.diag(x, autoburnin=FALSE)  
 Potential      scale      reduction factors:

|            |            |          |
|------------|------------|----------|
|            | Point est. | Upper CI |
| Likelihood | 1          | 1        |
| Vmax       | 1.01       | 1.03     |
| Km         | 1.01       | 1.03     |

Multivariate      psrf

1.01

>

>      summary(x1)

|            |                  |         |
|------------|------------------|---------|
| Iterations | =                | 1:10000 |
| Thinning   | interval =       | 1       |
| Number     | of chains =      | 1       |
| Sample     | size per chain = | 10000   |

1 Empirical mean and standard deviation for each variable  
 plus standard error of the mean:

|            |         |          |          |          |               |
|------------|---------|----------|----------|----------|---------------|
|            | Mean    | SD       | Naive    | SE       | Time-serie SE |
| Likelihood | 0.15    | 1.26E-02 | 1.26E-04 | 0.000211 |               |
| Vmax       | -2.0324 | 5.98E-02 | 5.98E-04 | 0.005499 |               |
| Km         | 0.5426  | 0.07296  | 0.00073  | 0.006626 |               |

2 Quantiles for each variable:

|            |         |          |          |         |         |
|------------|---------|----------|----------|---------|---------|
|            | 2.50%   | 25%      | 50%      | 75%     | 97.50%  |
| Likelihood | 0.1283  | 1.41E-01 | 1.49E-01 | 0.1579  | 0.1777  |
| Vmax       | -2.1416 | -2.0738  | -2.0341  | -1.9979 | -1.8976 |
| Km         | 0.4094  | 4.93E-01 | 5.41E-01 | 0.5853  | 0.7042  |

>      summary(x2)

|            |                  |         |
|------------|------------------|---------|
| Iterations | =                | 1:10000 |
| Thinning   | interval =       | 1       |
| Number     | of chains =      | 1       |
| Sample     | size per chain = | 10000   |

1 Empirical mean and standard deviation for each variable  
 plus standard error of the mean:

|            |         |         |          |          |               |
|------------|---------|---------|----------|----------|---------------|
|            | Mean    | SD      | Naive    | SE       | Time-serie SE |
| Likelihood | 0.1501  | 0.01273 | 0.000127 | 0.000219 |               |
| Vmax       | -2.0425 | 0.05586 | 0.000559 | 0.004609 |               |

# Mouse Lung

Km 0.5302 0.06889 0.000689 0.005681

2 Quantiles for each variable:

|            | 2.50%   | 25%     | 50%     | 75%     | 97.50%  |
|------------|---------|---------|---------|---------|---------|
| Likelihood | 0.1273  | 0.141   | 0.1491  | 0.1582  | 0.1773  |
| Vmax       | -2.1532 | -2.0774 | -2.0426 | -2.0102 | -1.9203 |
| Km         | 0.3939  | 0.4869  | 0.5294  | 0.5702  | 0.6768  |

> summary(x3)

|            |          |         |       |   |       |
|------------|----------|---------|-------|---|-------|
| Iterations | =        | 1:10000 |       |   |       |
| Thinning   | interval | =       | 1     |   |       |
| Number     | of       | chains  | =     | 1 |       |
| Sample     | size     | per     | chain | = | 10000 |

1 Empirical mean and standard deviation for each variable  
plus standard error of the mean:

|            | Mean    | SD      | Naive    | SE       | Time-series SE |
|------------|---------|---------|----------|----------|----------------|
| Likelihood | 0.1504  | 0.01272 | 0.000127 | 0.000213 |                |
| Vmax       | -2.0315 | 0.05622 | 0.000562 | 0.004598 |                |
| Km         | 0.5444  | 0.06879 | 0.000688 | 0.005782 |                |

2 Quantiles for each variable:

|            | 2.50%   | 25%     | 50%     | 75%     | 97.50%  |
|------------|---------|---------|---------|---------|---------|
| Likelihood | 0.1278  | 0.1414  | 0.1497  | 0.1585  | 0.1775  |
| Vmax       | -2.1342 | -2.0695 | -2.0338 | -1.9979 | -1.9093 |
| Km         | 0.4199  | 0.4984  | 0.5421  | 0.5851  | 0.6904  |

# Mouse Kidney

Female

| Log |    |                 | Average | 95% CI |        |
|-----|----|-----------------|---------|--------|--------|
|     | KF | L/hr/mg protein | -7.056  | -7.896 | -6.553 |

Male

|      |                               |  | Average | 95% CI |       |
|------|-------------------------------|--|---------|--------|-------|
| Vmax | $\mu\text{mol/hr/mg protein}$ |  | -4.59   | -4.86  | -4.32 |
| Km   | $\mu\text{mol/L}$             |  | -0.55   | -0.87  | -0.23 |

Female

| EXP |    |                 | Average | 95% CI  |         |
|-----|----|-----------------|---------|---------|---------|
|     | KF | L/hr/mg protein | 0.00043 | 0.00019 | 0.00071 |

Note: 2 mg of protein used in assay (VK was not scaled in the in vitro model - lung was 1 mg so not needed)

Male

|      |                               |  | Average | 95% CI |       |
|------|-------------------------------|--|---------|--------|-------|
| Vmax | $\mu\text{mol/hr/mg protein}$ |  | 0.010   | 0.008  | 0.013 |
| Km   | $\mu\text{mol/L}$             |  | 0.58    | 0.42   | 0.79  |

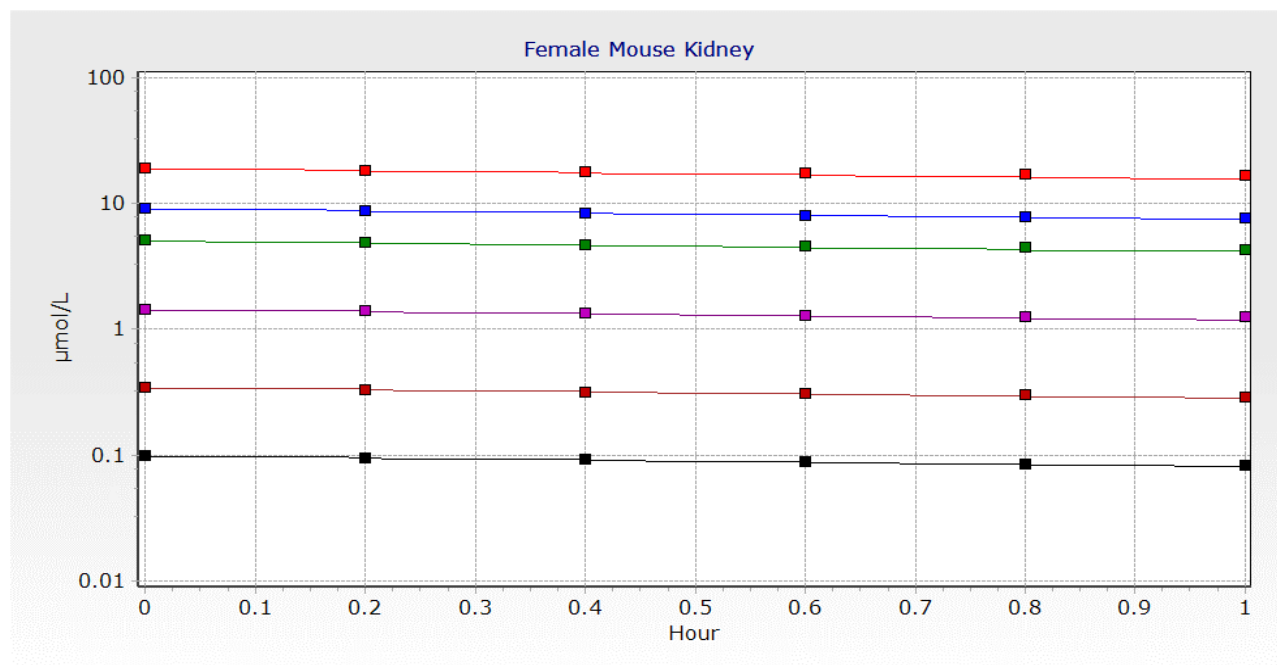

# Mouse Kidney

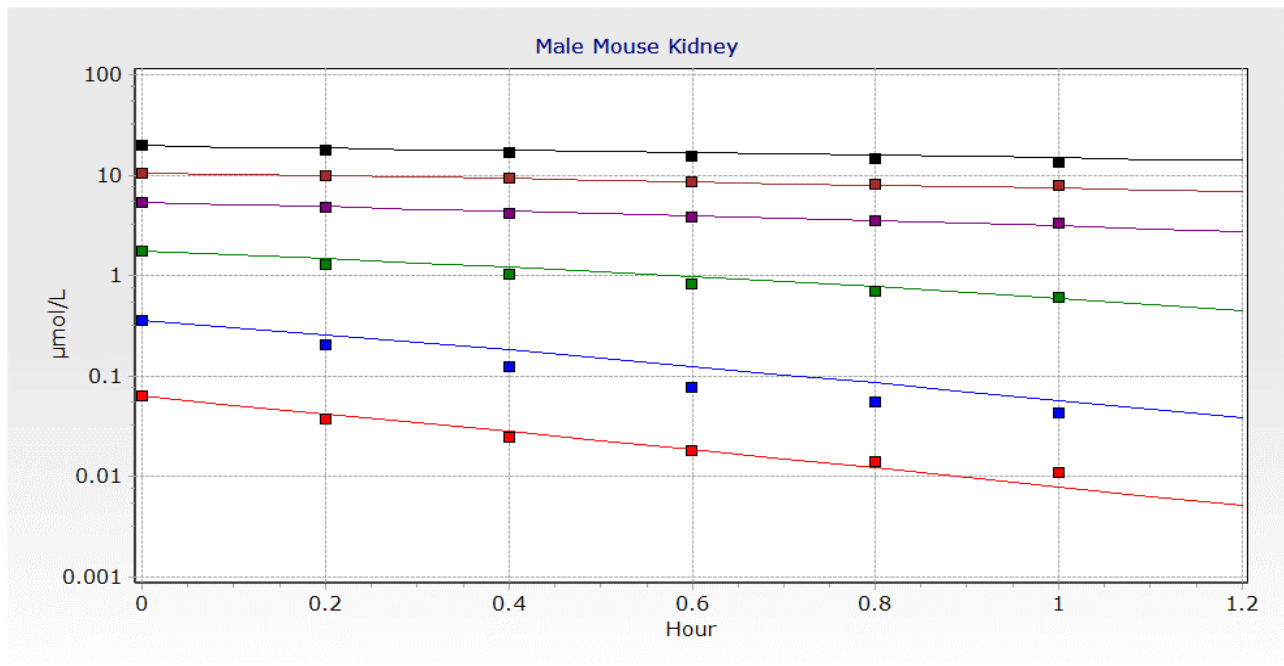

# Mouse Kidney

```

Female  gelman.diag(x, autoburnin=FALSE)
Potential scale      reduction factors:

      Point est. Upper CI
Likelihood      1      1
KF              1      1

Multivariate  psrf

1
>
> summary(x1)

Iterations = 1:10000
Thinning interval = 1
Number of chains = 1
Sample size per chain = 10000

1 Empirical mean and standard deviation for each variable
plus standard error of the mean:

      Mean      SD      Naive SE      Time-series SE
Likelihood  0.05436 0.006977 6.98E-05 0.000125
KF          -7.0563 0.347454 3.48E-03 0.006682

2 Quantiles for each variable:

      2.50%      25%      50%      75%      97.50%
Likelihood  0.04267 0.04948 0.05357 0.05872 0.06954
KF          -7.90  -7.22  -7.00  -6.82  -6.55

> summary(x2)

Iterations = 1:10000
Thinning interval = 1
Number of chains = 1
Sample size per chain = 10000

1 Empirical mean and standard deviation for each variable
plus standard error of the mean:

      Mean      SD      Naive SE      Time-series SE
Likelihood  0.05426 0.006831 6.83E-05 0.000122
KF          -7.06236 0.352842 3.53E-03 0.007388

2 Quantiles for each variable:

```

# Mouse Kidney

|            | 2.50%    | 25%      | 50%      | 75%      | 97.50%  |
|------------|----------|----------|----------|----------|---------|
| Likelihood | 0.04286  | 0.04942  | 0.05366  | 0.05831  | 0.0696  |
| KF         | -7.91035 | -7.22355 | -7.00181 | -6.83392 | -6.5666 |

> summary(x3)

```

Iterations = 1:10000
Thinning interval = 1
Number of chains = 1
Sample size per chain = 10000

```

1 Empirical mean and standard deviation for each variable  
plus standard error of the mean:

|            | Mean     | SD       | Naive SE | Time-series SE |
|------------|----------|----------|----------|----------------|
| Likelihood | 0.05438  | 0.006972 | 6.97E-05 | 0.000135       |
| KF         | -7.07084 | 0.354618 | 3.55E-03 | 0.007015       |

2 Quantiles for each variable:

|            | 2.50%    | 25%      | 50%      | 75%      | 97.50%   |
|------------|----------|----------|----------|----------|----------|
| Likelihood | 0.04282  | 0.04945  | 0.05362  | 0.05847  | 0.06985  |
| KF         | -7.91999 | -7.22633 | -7.01231 | -6.84524 | -6.55977 |



# Mouse Kidney

```

Male      gelman.diag(x, autoburnin=FALSE)
Potential scale      reduction factors:

          Point est. Upper CI
Likelihood          1      1
Vmax                1      1
Km                  1      1

Multivariate      psrf

1
>
>      summary(x1)

Iterations      =      1:10000
Thinning        interval =      1
Number          of      chains =      1
Sample          size      per      chain =      10000

1 Empirical mean and standard deviation for each variable
plus      standard error      of      the      mean:

      Mean      SD      Naive      SE      Time-series SE
Likelihood      0.1668  2.14E-02  2.14E-04  0.000389
Vmax             -4.5935  1.38E-01  1.38E-03  0.010119
Km               -0.552   0.163   0.00163  0.011951

2 Quantiles for      each      variable:

      2.50%      25%      50%      75%      97.50%
Likelihood      0.1312  1.52E-01  1.65E-01  0.1798  0.214
Vmax             -4.8606  -4.6882  -4.5891  -4.5057  -4.315
Km               -0.8682  -6.63E-01  -5.52E-01  -0.4457  -0.231

>      summary(x2)

Iterations      =      1:10000
Thinning        interval =      1
Number          of      chains =      1
Sample          size      per      chain =      10000

1 Empirical mean and standard deviation for each variable
plus      standard error      of      the      mean:

      Mean      SD      Naive      SE      Time-series SE
Likelihood      0.1668  0.02106  0.000211  0.000376
Vmax             -4.6043  0.14446  0.001445  0.010337

```

# Mouse Kidney

Km                    -0.563    0.1714 0.001714   0.01248

2 Quantiles for            each            variable:

|            |         |         |         |         |         |
|------------|---------|---------|---------|---------|---------|
|            | 2.50%   | 25%     | 50%     | 75%     | 97.50%  |
| Likelihood | 0.1317  | 0.1519  | 0.1649  | 0.1791  | 0.2151  |
| Vmax       | -4.8867 | -4.7005 | -4.6021 | -4.5126 | -4.3084 |
| Km         | -0.9081 | -0.6784 | -0.5623 | -0.4552 | -0.2094 |

>                    summary(x3)

|            |          |         |       |   |       |
|------------|----------|---------|-------|---|-------|
| Iterations | =        | 1:10000 |       |   |       |
| Thinning   | interval | =       | 1     |   |       |
| Number     | of       | chains  | =     | 1 |       |
| Sample     | size     | per     | chain | = | 10000 |

1 Empirical mean and standard deviation for each variable  
plus            standard   error            of            the            mean:

|            |         |         |          |          |                |
|------------|---------|---------|----------|----------|----------------|
|            | Mean    | SD      | Naive    | SE       | Time-series SE |
| Likelihood | 0.1671  | 0.02115 | 0.000212 | 0.00036  |                |
| Vmax       | -4.5944 | 0.14189 | 0.001419 | 0.009994 |                |
| Km         | -0.5529 | 0.16812 | 0.001681 | 0.011675 |                |

2 Quantiles for            each            variable:

|            |         |         |         |         |         |
|------------|---------|---------|---------|---------|---------|
|            | 2.50%   | 25%     | 50%     | 75%     | 97.50%  |
| Likelihood | 0.1322  | 0.1523  | 0.1652  | 0.1801  | 0.214   |
| Vmax       | -4.8713 | -4.6878 | -4.593  | -4.5042 | -4.3089 |
| Km         | -0.8801 | -0.6603 | -0.5517 | -0.4467 | -0.2155 |

# Rat Liver

## Female

| Log |      |                               | Average | 95% CI |       |
|-----|------|-------------------------------|---------|--------|-------|
|     | Vmax | $\mu\text{mol/hr/mg protein}$ | -2.64   | -2.85  | -2.44 |
|     | Km   | $\mu\text{mol/L}$             | -0.30   | -0.57  | -0.04 |

## Male

|      |                               | Average | 95% CI |       |
|------|-------------------------------|---------|--------|-------|
| Vmax | $\mu\text{mol/hr/mg protein}$ | -2.65   | -2.69  | -2.61 |
| Km   | $\mu\text{mol/L}$             | -1.06   | -1.15  | -0.97 |

## Female

| EXP |      |                               | Average | 95% CI |       |
|-----|------|-------------------------------|---------|--------|-------|
|     | Vmax | $\mu\text{mol/hr/mg protein}$ | 0.072   | 0.058  | 0.087 |
|     | Km   | $\mu\text{mol/L}$             | 0.74    | 0.57   | 0.96  |

## Male

|      |                               | Average | 95% CI |       |
|------|-------------------------------|---------|--------|-------|
| Vmax | $\mu\text{mol/hr/mg protein}$ | 0.071   | 0.068  | 0.074 |
| Km   | $\mu\text{mol/L}$             | 0.35    | 0.32   | 0.38  |

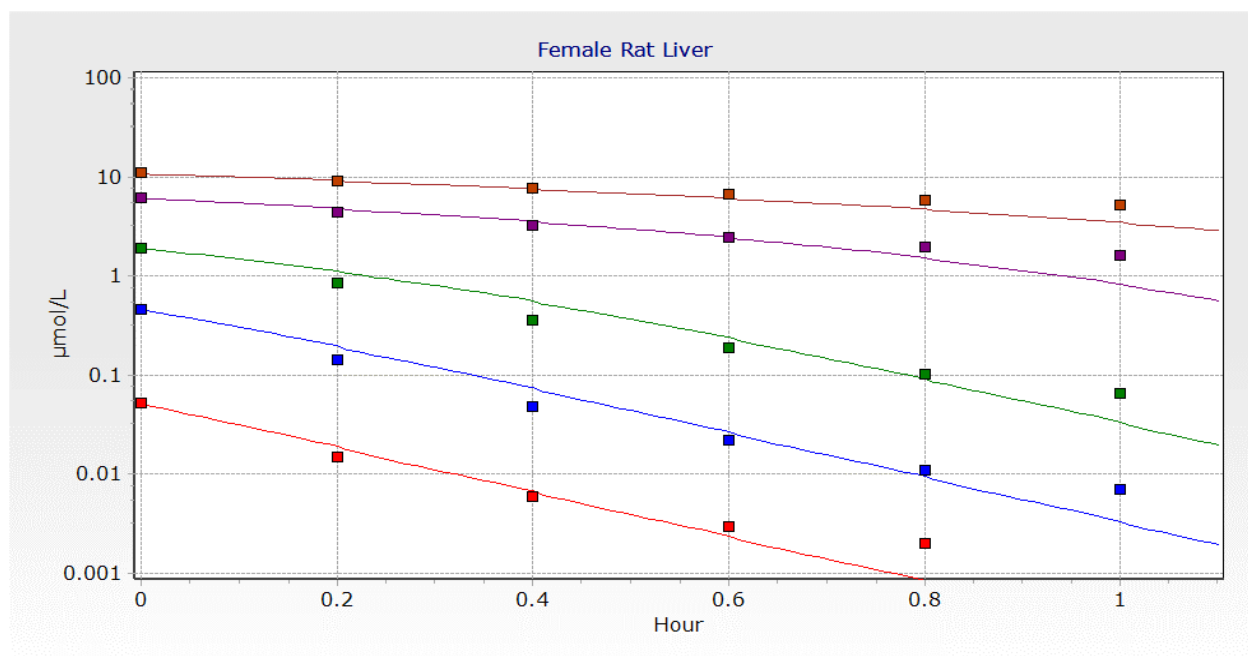

# Rat Liver

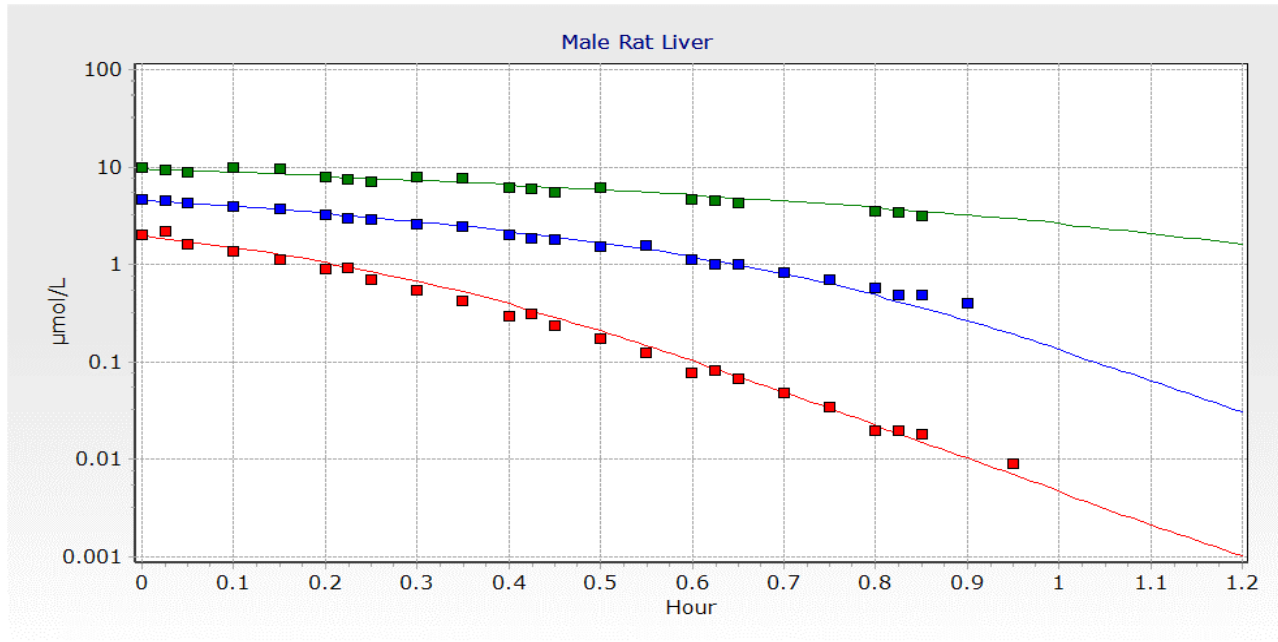

Female gelman.diag(x, autoburnin=FALSE)  
Potential scale reduction factors:

|            | Point est. | Upper CI |
|------------|------------|----------|
| Likelihood | 1          | 1        |
| Vmax       | 1          | 1        |
| Km         | 1          | 1        |

Multivariate psrf

```
1
>
> summary(x1)
```

|            |                  |         |
|------------|------------------|---------|
| Iterations | =                | 1:10000 |
| Thinning   | interval =       | 1       |
| Number     | of chains =      | 1       |
| Sample     | size per chain = | 10000   |

1 Empirical mean and standard deviation for each variable  
plus standard error of the mean:

|            | Mean    | SD      | Naive    | SE       | Time-series SE |
|------------|---------|---------|----------|----------|----------------|
| Likelihood | 0.3036  | 0.04508 | 0.000451 | 0.000803 |                |
| Vmax       | -2.6364 | 0.10084 | 0.001008 | 0.0069   |                |
| Km         | -0.2997 | 0.12941 | 0.001294 | 0.008673 |                |

2 Quantiles for each variable:

|            | 2.50%    | 25%     | 50%     | 75%     | 97.50%   |
|------------|----------|---------|---------|---------|----------|
| Likelihood | 0.2305   | 0.2716  | 0.2979  | 0.3311  | 0.4064   |
| Vmax       | -284.82% | -270%   | -264%   | -257%   | -244.19% |
| Km         | -0.5655  | -0.3801 | -0.2997 | -0.2163 | -0.04314 |

```
> summary(x2)
```

|            |                  |         |
|------------|------------------|---------|
| Iterations | =                | 1:10000 |
| Thinning   | interval =       | 1       |
| Number     | of chains =      | 1       |
| Sample     | size per chain = | 10000   |

1 Empirical mean and standard deviation for each variable  
plus standard error of the mean:

|            | Mean    | SD      | Naive    | SE       | Time-series SE |
|------------|---------|---------|----------|----------|----------------|
| Likelihood | 0.3036  | 0.04408 | 0.000441 | 0.000737 |                |
| Vmax       | -2.6348 | 0.10162 | 0.001016 | 0.006766 |                |

# Rat Liver

Km -0.2994 0.13007 0.001301 0.008482

2 Quantiles for each variable:

|            | 2.50%   | 25%     | 50%     | 75%     | 97.50%   |
|------------|---------|---------|---------|---------|----------|
| Likelihood | 0.2321  | 0.2713  | 0.2983  | 0.3293  | 0.40211  |
| Vmax       | -2.8249 | -2.7046 | -2.637  | -2.5725 | -2.42029 |
| Km         | -0.5443 | -0.3869 | -0.3033 | -0.2192 | -0.01368 |

> summary(x3)

|            |          |         |       |   |       |
|------------|----------|---------|-------|---|-------|
| Iterations | =        | 1:10000 |       |   |       |
| Thinning   | interval | =       | 1     |   |       |
| Number     | of       | chains  | =     | 1 |       |
| Sample     | size     | per     | chain | = | 10000 |

1 Empirical mean and standard deviation for each variable plus standard error of the mean:

|            | Mean    | SD      | Naive    | SE       | Time-series SE |
|------------|---------|---------|----------|----------|----------------|
| Likelihood | 0.3042  | 0.04407 | 0.000441 | 0.000818 |                |
| Vmax       | -2.6326 | 0.09537 | 0.000954 | 0.00579  |                |
| Km         | -0.2953 | 0.12156 | 0.001216 | 0.007502 |                |

2 Quantiles for each variable:

|            | 2.50%   | 25%    | 50%     | 75%     | 97.50%   |
|------------|---------|--------|---------|---------|----------|
| Likelihood | 0.2329  | 0.272  | 0.2989  | 0.3305  | 0.40475  |
| Vmax       | -2.8233 | -2.697 | -2.6305 | -2.567  | -2.4509  |
| Km         | -0.5337 | -0.38  | -0.2928 | -0.2123 | -0.06394 |

```

Male      gelman.diag(x, autoburnin=FALSE)
Potential scale      reduction factors:

          Point est. Upper CI
Likelihood          1      1
Vmax                1      1
Km                  1      1

Multivariate      psrf

1
>
>      summary(x1)

Iterations      =      1:10000
Thinning        interval =      1
Number          of      chains =      1
Sample         size      per      chain =      10000

1 Empirical mean and standard deviation for each variable
plus      standard error      of      the      mean:

      Mean      SD      Naive      SE      Time-series SE
Likelihood      0.1343      0.01211      0.000121      0.000202
Vmax            -2.6517      0.02121      0.000212      0.001302
Km              -1.0562      0.04554      0.000455      0.002823

2 Quantiles for      each      variable:

      2.50%      25%      50%      75%      97.50%
Likelihood      0.1132      0.1255      0.1335      0.1421      0.1604
Vmax            -269.32%      -267%      -265%      -264%      -260.93%
Km              -1.1479      -1.086      -1.0565      -1.0264      -0.966

>      summary(x2)

Iterations      =      1:10000
Thinning        interval =      1
Number          of      chains =      1
Sample         size      per      chain =      10000

1 Empirical mean and standard deviation for each variable
plus      standard error      of      the      mean:

      Mean      SD      Naive      SE      Time-series SE
Likelihood      0.134      0.01204      0.00012      0.000205
Vmax            -2.652      0.02063      0.000206      0.00121

```

# Rat Liver

Km -1.056 0.04378 0.000438 0.002598

2 Quantiles for each variable:

|            | 2.50%   | 25%     | 50%     | 75%     | 97.50%  |
|------------|---------|---------|---------|---------|---------|
| Likelihood | 0.1131  | 0.1257  | 0.1327  | 0.1415  | 0.1601  |
| Vmax       | -2.692  | -2.6655 | -2.6524 | -2.6379 | -2.6093 |
| Km         | -1.1437 | -1.0856 | -1.0573 | -1.0274 | -0.9659 |

> summary(x3)

|            |          |         |       |   |       |
|------------|----------|---------|-------|---|-------|
| Iterations | =        | 1:10000 |       |   |       |
| Thinning   | interval | =       | 1     |   |       |
| Number     | of       | chains  | =     | 1 |       |
| Sample     | size     | per     | chain | = | 10000 |

1 Empirical mean and standard deviation for each variable plus standard error of the mean:

|            | Mean    | SD      | Naive    | SE       | Time-series SE |
|------------|---------|---------|----------|----------|----------------|
| Likelihood | 0.1344  | 0.01224 | 0.000122 | 0.000207 |                |
| Vmax       | -2.6509 | 0.02058 | 0.000206 | 0.001202 |                |
| Km         | -1.0544 | 0.044   | 0.00044  | 0.002518 |                |

2 Quantiles for each variable:

|            | 2.50%   | 25%     | 50%     | 75%     | 97.50%  |
|------------|---------|---------|---------|---------|---------|
| Likelihood | 0.1126  | 0.1258  | 0.1335  | 0.1419  | 0.1614  |
| Vmax       | -2.6904 | -2.6651 | -2.6505 | -2.6376 | -2.6089 |
| Km         | -1.1393 | -1.0839 | -1.0539 | -1.0256 | -0.9653 |



# Rat Lung

|     |        |                 |         |          |         |
|-----|--------|-----------------|---------|----------|---------|
| Log | Female |                 | Median  | 95% CI   |         |
|     | KF     | L/hr/mg protein | -7.7880 | -9.8580  | -5.3120 |
|     | Male   |                 | Median  | 95% CI   |         |
|     | KF     | L/hr/mg protein | -7.0480 | -9.7970  | -4.0630 |
| EXP | Female |                 | Median  | 95% CI   |         |
|     | KF     | L/hr/mg protein | 0.00041 | 0.000052 | 0.00493 |
|     | Male   |                 | Median  | 95% CI   |         |
|     | KF     | L/hr/mg protein | 0.00087 | 0.00006  | 0.0172  |

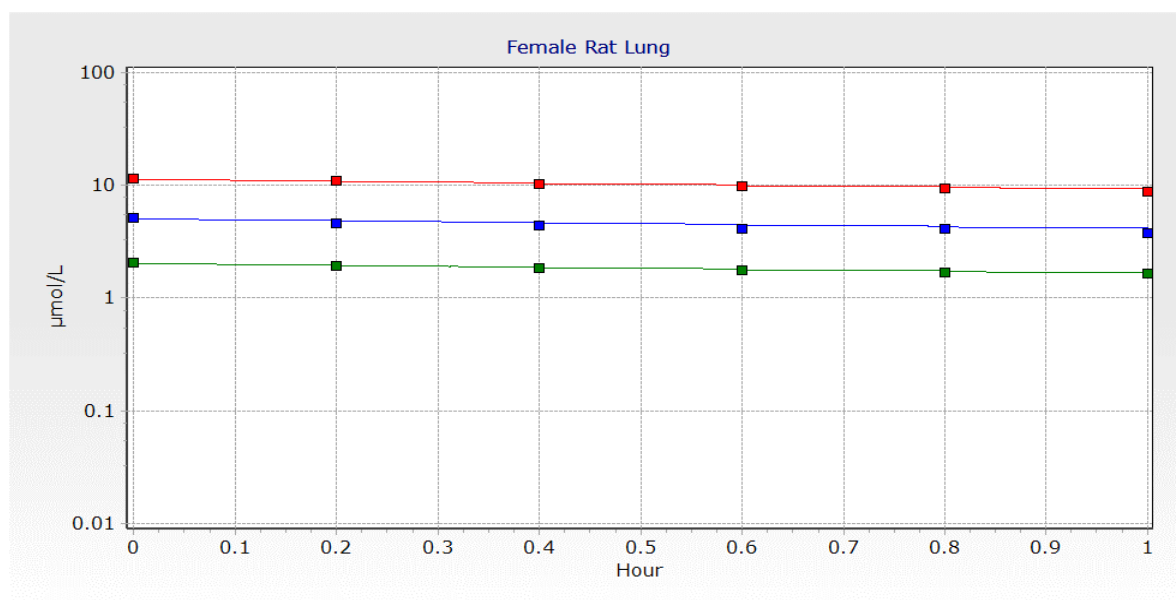

## Rat Lung

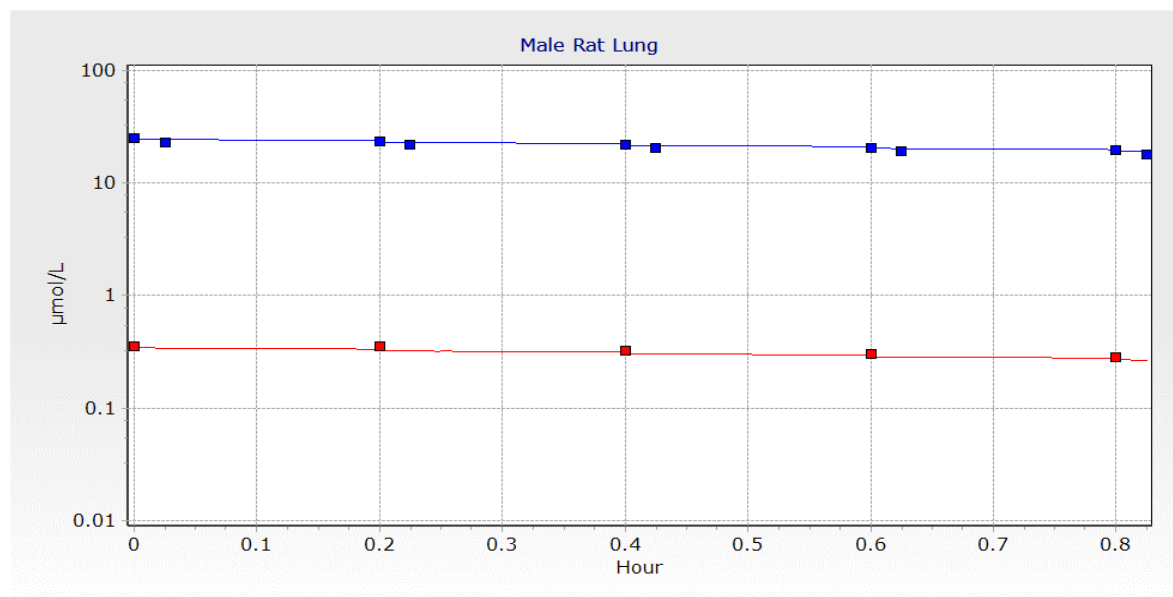

Female gelman.diag(x, autoburnin=FALSE)  
Potential scale reduction factors:

|            |            |          |
|------------|------------|----------|
|            | Point est. | Upper CI |
| Likelihood | 1.05       | 1.16     |
| KF         | 1          | 1        |

Multivariate psrf

1.05

>

> summary(x1)

|            |                  |         |
|------------|------------------|---------|
| Iterations | =                | 1:10000 |
| Thinning   | interval =       | 1       |
| Number     | of chains =      | 1       |
| Sample     | size per chain = | 10000   |

1 Empirical mean and standard deviation for each variable  
plus standard error of the mean:

|            |        |       |          |          |                |
|------------|--------|-------|----------|----------|----------------|
|            | Mean   | SD    | Naive    | SE       | Time-series SE |
| Likelihood | 2.05   | 0.309 | 3.09E-03 | 0.005108 |                |
| KF         | -7.788 | 1.284 | 1.28E-02 | 0.018051 |                |

2 Quantiles for each variable:

|            |        |        |           |        |        |
|------------|--------|--------|-----------|--------|--------|
|            | 2.50%  | 25%    | 50%       | 75%    | 97.50% |
| Likelihood | 1.533  | 1.828  | 2.02E+00  | 2.244  | 2.721  |
| KF         | -9.858 | -8.849 | -7.82E+00 | -6.808 | -5.312 |

> summary(x2)

|            |                  |         |
|------------|------------------|---------|
| Iterations | =                | 1:10000 |
| Thinning   | interval =       | 1       |
| Number     | of chains =      | 1       |
| Sample     | size per chain = | 10000   |

1 Empirical mean and standard deviation for each variable  
plus standard error of the mean:

|            |        |        |          |          |                |
|------------|--------|--------|----------|----------|----------------|
|            | Mean   | SD     | Naive    | SE       | Time-series SE |
| Likelihood | 2.203  | 0.3273 | 3.27E-03 | 0.005313 |                |
| KF         | -7.777 | 1.2763 | 1.28E-02 | 0.017886 |                |

2 Quantiles for each variable:

# Rat Lung

|            | 2.50%  | 25%    | 50%    | 75%    | 97.50% |
|------------|--------|--------|--------|--------|--------|
| Likelihood | 1.662  | 1.968  | 2.166  | 2.401  | 2.945  |
| KF         | -9.841 | -8.824 | -7.828 | -6.818 | -5.276 |

> summary(x3)

```

Iterations = 1:10000
Thinning interval = 1.00E+00
Number of chains = 1
Sample size per chain = 10000

```

1 Empirical mean and standard deviation for each variable  
plus standard error of the mean:

|            | Mean   | SD     | Naive SE | Time-series SE |
|------------|--------|--------|----------|----------------|
| Likelihood | 2.068  | 0.3201 | 3.20E-03 | 0.005258       |
| KF         | -7.789 | 1.2784 | 1.28E-02 | 0.018117       |

2 Quantiles for each variable:

|            | 2.50%  | 25%    | 50%    | 75%    | 97.50% |
|------------|--------|--------|--------|--------|--------|
| Likelihood | 1.534  | 1.841  | 2.036  | 2.263  | 2.774  |
| KF         | -9.865 | -8.815 | -7.842 | -6.823 | -5.3   |

# Rat Lung

```
male      gelman.diag(x, autoburnin=FALSE)
Potential scale      reduction factors:

Point est. Upper CI
Likelihood      1.05      1.16
KF              1        1

Multivariate      psrf

1.05
>
>      summary(x1)

Iterations      =      1:10000
Thinning        interval      =      1
Number          of      chains      =      1
Sample          size      per      chain      =      10000

1 Empirical mean and standard deviation for each variable
plus      standard error      of      the      mean:

Mean      SD      Naive      SE      Time-series      SE
Likelihood      2.04      0.3347      0.003347      0.005455
KF              -7.048      1.6157      0.016157      0.021677

2 Quantiles for      each      variable:

2.50%      25%      50%      75%      97.50%
Likelihood      1.487      1.803      2.001      2.24      2.815
KF              -9.797      -8.355      -7.058      -5.784      -4.063

>      summary(x2)

Iterations      =      1:10000
Thinning        interval      =      1
Number          of      chains      =      1
Sample          size      per      chain      =      10000

1 Empirical mean and standard deviation for each variable
plus      standard error      of      the      mean:

Mean      SD      Naive      SE      Time-series      SE
Likelihood      2.179      0.3438      0.003438      0.005596
KF              -7.015      1.5991      0.015991      0.021262

2 Quantiles for      each      variable:
```

# Rat Lung

|            | 2.50%  | 25%    | 50%    | 75%    | 97.50% |
|------------|--------|--------|--------|--------|--------|
| Likelihood | 1.6    | 1.942  | 2.152  | 2.383  | 2.938  |
| KF         | -9.804 | -8.299 | -7.006 | -5.784 | -4.053 |

> summary(x3)

```

Iterations = 1:10000
Thinning interval = 1
Number of chains = 1
Sample size per chain = 10000

```

1 Empirical mean and standard deviation for each variable  
plus standard error of the mean:

|            | Mean   | SD     | Naive SE | Time-series SE |
|------------|--------|--------|----------|----------------|
| Likelihood | 2.019  | 0.3376 | 0.003376 | 0.005777       |
| KF         | -7.087 | 1.599  | 0.01599  | 0.021289       |

2 Quantiles for each variable:

|            | 2.50%  | 25%    | 50%    | 75%   | 97.50% |
|------------|--------|--------|--------|-------|--------|
| Likelihood | 1.468  | 1.777  | 1.973  | 2.218 | 2.813  |
| KF         | -9.811 | -8.396 | -7.077 | -5.84 | -4.137 |

# Rat Kidney

## Female

| Log |      |                      | Average | 95% CI |       |
|-----|------|----------------------|---------|--------|-------|
|     | Vmax | $\mu\text{mol/hr/r}$ | -5.650  | -5.904 | -5.39 |
|     | Km   | $\mu\text{mol/L}$    | -0.599  | -0.912 | -0.28 |

## Male

|      |                      | Average | 95% CI |       |
|------|----------------------|---------|--------|-------|
| Vmax | $\mu\text{mol/hr/r}$ | -5.51   | -5.77  | -5.22 |
| Km   | $\mu\text{mol/L}$    | -0.17   | -0.49  | 0.16  |

## Female

| EXP |      |                      | Average | 95% CI |        |
|-----|------|----------------------|---------|--------|--------|
|     | Vmax | $\mu\text{mol/hr/r}$ | 0.0035  | 0.0027 | 0.0046 |
|     | Km   | $\mu\text{mol/L}$    | 0.55    | 0.40   | 0.76   |

## Male

|      |                      | Average | 95% CI |        |
|------|----------------------|---------|--------|--------|
| Vmax | $\mu\text{mol/hr/r}$ | 0.0041  | 0.0031 | 0.0054 |
| Km   | $\mu\text{mol/L}$    | 0.84    | 0.61   | 1.18   |

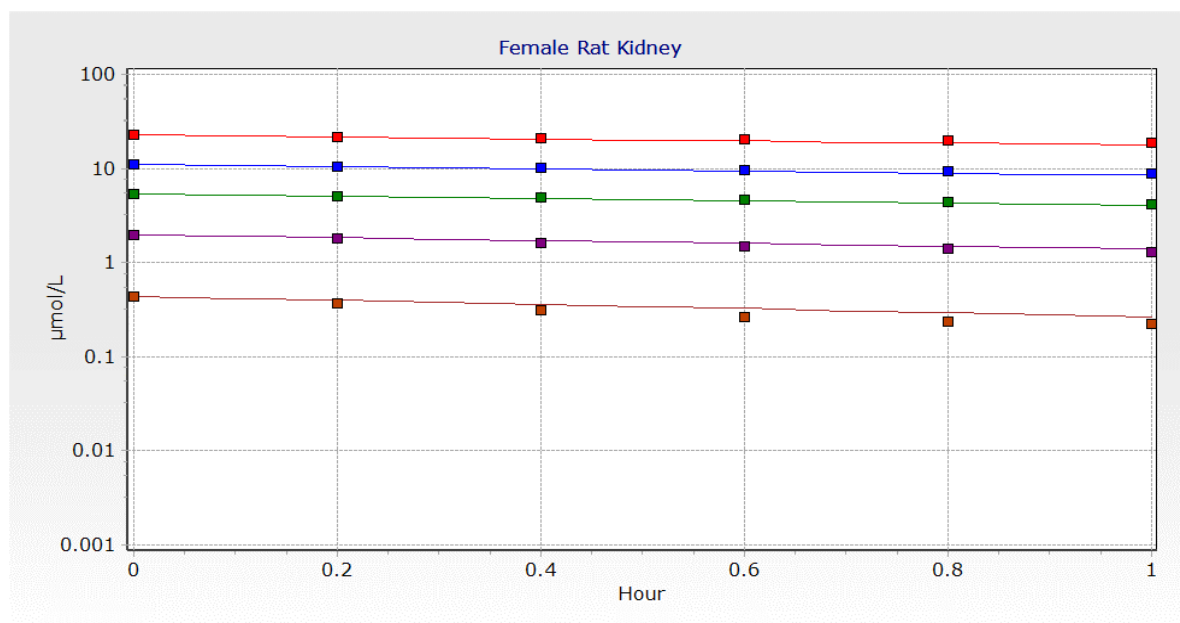

# Rat Kidney

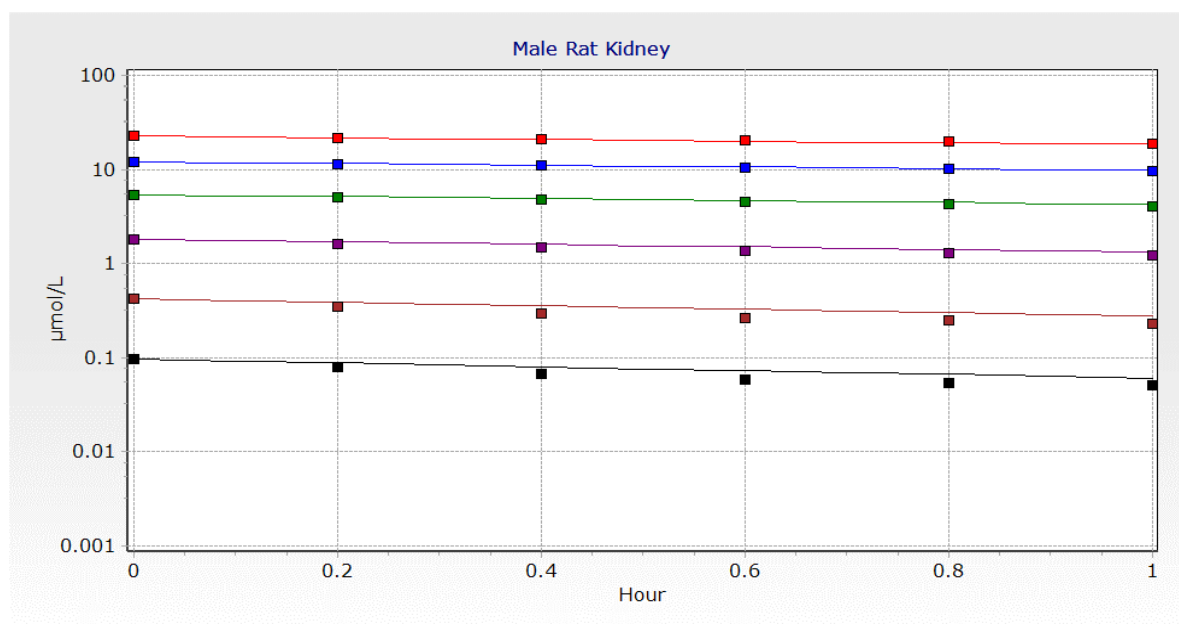



Female gelman.diag(x, autoburnin=FALSE)  
Potential scale reduction factors:

|            | Point est. | Upper CI |
|------------|------------|----------|
| Likelihood | 1          | 1        |
| Vmax       | 1.01       | 1.01     |
| Km         | 1.01       | 1.01     |

Multivariate psrf

```
1
>
> summary(x1)
```

|            |                  |         |
|------------|------------------|---------|
| Iterations | =                | 1:10000 |
| Thinning   | interval =       | 1       |
| Number     | of chains =      | 1       |
| Sample     | size per chain = | 10000   |

1 Empirical mean and standard deviation for each variable  
plus standard error of the mean:

|            | Mean     | SD       | Naive    | SE       | Time-series SE |
|------------|----------|----------|----------|----------|----------------|
| Likelihood | 0.05173  | 0.006683 | 6.68E-05 | 1.10E-04 |                |
| Vmax       | -5.65033 | 0.130268 | 1.30E-03 | 9.59E-03 |                |
| Km         | -0.59938 | 0.160524 | 1.61E-03 | 1.16E-02 |                |

2 Quantiles for each variable:

|            | 2.50%    | 25%      | 50%      | 75%      | 97.50%   |
|------------|----------|----------|----------|----------|----------|
| Likelihood | 0.04053  | 0.04693  | 0.05125  | 0.05584  | 0.06675  |
| Vmax       | -5.90355 | -5.74056 | -5.65076 | -5.56237 | -5.38774 |
| Km         | -0.91238 | -0.70759 | -0.60173 | -0.49152 | -0.27719 |

```
> summary(x2)
```

|            |                  |         |
|------------|------------------|---------|
| Iterations | =                | 1:10000 |
| Thinning   | interval =       | 1       |
| Number     | of chains =      | 1       |
| Sample     | size per chain = | 10000   |

1 Empirical mean and standard deviation for each variable  
plus standard error of the mean:

# Rat Kidney

|            | Mean     | SD       | Naive    | SE       | Time-series SE |
|------------|----------|----------|----------|----------|----------------|
| Likelihood | 0.05161  | 0.006409 | 6.41E-05 | 1.03E-04 |                |
| Vmax       | -5.65309 | 0.140733 | 1.41E-03 | 1.15E-02 |                |
| Km         | -0.60259 | 0.17301  | 1.73E-03 | 1.40E-02 |                |

2 Quantiles for each variable:

|            | 2.50%    | 25%      | 50%      | 75%      | 97.50%  |
|------------|----------|----------|----------|----------|---------|
| Likelihood | 0.04078  | 0.04703  | 0.05111  | 0.05564  | 0.0655  |
| Vmax       | -5.93537 | -5.74771 | -5.64618 | -5.553   | -5.3921 |
| Km         | -0.95007 | -0.72112 | -0.59589 | -0.47809 | -0.2866 |

> summary(x3)

|            |          |         |       |   |       |
|------------|----------|---------|-------|---|-------|
| Iterations | =        | 1:10000 |       |   |       |
| Thinning   | interval | =       | 1     |   |       |
| Number     | of       | chains  | =     | 1 |       |
| Sample     | size     | per     | chain | = | 10000 |

1 Empirical mean and standard deviation for each variable plus standard error of the mean:

|            | Mean     | SD      | Naive    | SE       | Time-series SE |
|------------|----------|---------|----------|----------|----------------|
| Likelihood | 0.05208  | 0.00656 | 6.56E-05 | 1.12E-04 |                |
| Vmax       | -5.63819 | 0.15445 | 1.54E-03 | 1.35E-02 |                |
| Km         | -0.58345 | 0.18904 | 1.89E-03 | 1.66E-02 |                |

2 Quantiles for each variable:

|            | 2.50%    | 25%      | 50%     | 75%      | 97.50%   |
|------------|----------|----------|---------|----------|----------|
| Likelihood | 0.04121  | 0.04732  | 0.0513  | 0.05622  | 0.06658  |
| Vmax       | -5.94001 | -5.73934 | -5.6421 | -5.53731 | -5.31548 |
| Km         | -0.96118 | -0.70629 | -0.5889 | -0.46451 | -0.19042 |

Male gelman.diag(x, autoburnin=TRUE)  
Potential scale reduction factors:

|            | Point est. | Upper CI |
|------------|------------|----------|
| Likelihood | 1          | 1.01     |
| Vmax       | 1.02       | 1.07     |
| Km         | 1.02       | 1.07     |

Multivariate psrf

1.02

>

> summary(x1)

|            |                  |         |
|------------|------------------|---------|
| Iterations | =                | 1:10000 |
| Thinning   | interval =       | 1       |
| Number     | of chains =      | 1       |
| Sample     | size per chain = | 10000   |

1 Empirical mean and standard deviation for each variable  
plus standard error of the mean:

|            | Mean     | SD       | Naive    | SE       | Time-series SE |
|------------|----------|----------|----------|----------|----------------|
| Likelihood | 0.03728  | 0.004749 | 4.75E-05 | 8.11E-05 |                |
| Vmax       | -5.50646 | 0.137464 | 1.38E-03 | 1.18E-02 |                |
| Km         | -0.17303 | 0.165471 | 1.66E-03 | 1.45E-02 |                |

2 Quantiles for each variable:

|            | 2.50%    | 25%      | 50%     | 75%      | 97.50%   |
|------------|----------|----------|---------|----------|----------|
| Likelihood | 0.02942  | 0.03383  | 0.0369  | 0.04031  | 0.04757  |
| Vmax       | -5.77049 | -5.6005  | -5.5066 | -5.41614 | -5.22128 |
| Km         | -0.49155 | -0.28561 | -0.1706 | -0.06493 | 0.16198  |

>

summary(x2)

|            |                  |         |
|------------|------------------|---------|
| Iterations | =                | 1:10000 |
| Thinning   | interval =       | 1       |
| Number     | of chains =      | 1       |
| Sample     | size per chain = | 10000   |

1 Empirical mean and standard deviation for each variable  
plus standard error of the mean:

# Rat Kidney

|            | Mean     | SD       | Naive    | SE       | Time-series SE |
|------------|----------|----------|----------|----------|----------------|
| Likelihood | 0.03707  | 0.004638 | 4.64E-05 | 7.71E-05 |                |
| Vmax       | -5.51818 | 0.132386 | 1.32E-03 | 1.11E-02 |                |
| Km         | -0.18764 | 0.159757 | 1.60E-03 | 1.32E-02 |                |

2 Quantiles for each variable:

|            | 2.50%    | 25%      | 50%      | 75%      | 97.50%   |
|------------|----------|----------|----------|----------|----------|
| Likelihood | 0.02913  | 0.03379  | 0.03667  | 0.03985  | 0.04744  |
| Vmax       | -5.76623 | -5.60823 | -5.51901 | -5.43725 | -5.25247 |
| Km         | -0.48377 | -0.29546 | -0.19014 | -0.08872 | 0.13471  |

> summary(x3)

|            |          |         |       |   |       |
|------------|----------|---------|-------|---|-------|
| Iterations | =        | 1:10000 |       |   |       |
| Thinning   | interval | =       | 1     |   |       |
| Number     | of       | chains  | =     | 1 |       |
| Sample     | size     | per     | chain | = | 10000 |

1 Empirical mean and standard deviation for each variable  
plus standard error of the mean:

|            | Mean    | SD       | Naive    | SE       | Time-series SE |
|------------|---------|----------|----------|----------|----------------|
| Likelihood | 0.0371  | 0.004785 | 4.79E-05 | 8.59E-05 |                |
| Vmax       | -5.5344 | 0.135402 | 1.35E-03 | 1.20E-02 |                |
| Km         | -0.2076 | 0.163251 | 1.63E-03 | 1.49E-02 |                |

2 Quantiles for each variable:

|            | 2.50%    | 25%      | 50%      | 75%      | 97.50%   |
|------------|----------|----------|----------|----------|----------|
| Likelihood | 0.02927  | 0.03374  | 0.03665  | 0.04004  | 0.04774  |
| Vmax       | -5.81117 | -5.62335 | -5.53361 | -5.44755 | -5.26298 |
| Km         | -0.5343  | -0.31428 | -0.20534 | -0.1016  | 0.12265  |

Human Liver

| Mixed Human |      | Average   |        | 95% CI |       |
|-------------|------|-----------|--------|--------|-------|
| Log         | Vmax | μmol/hr/r | -2.959 | -2.992 | -2.93 |
|             | Km   | μmol/L    | -1.151 | -1.223 | -1.08 |

| Mixed Human |      | Average   |       | 95% CI |       |
|-------------|------|-----------|-------|--------|-------|
| EXP         | Vmax | μmol/hr/r | 0.052 | 0.050  | 0.054 |
|             | Km   | μmol/L    | 0.32  | 0.29   | 0.34  |

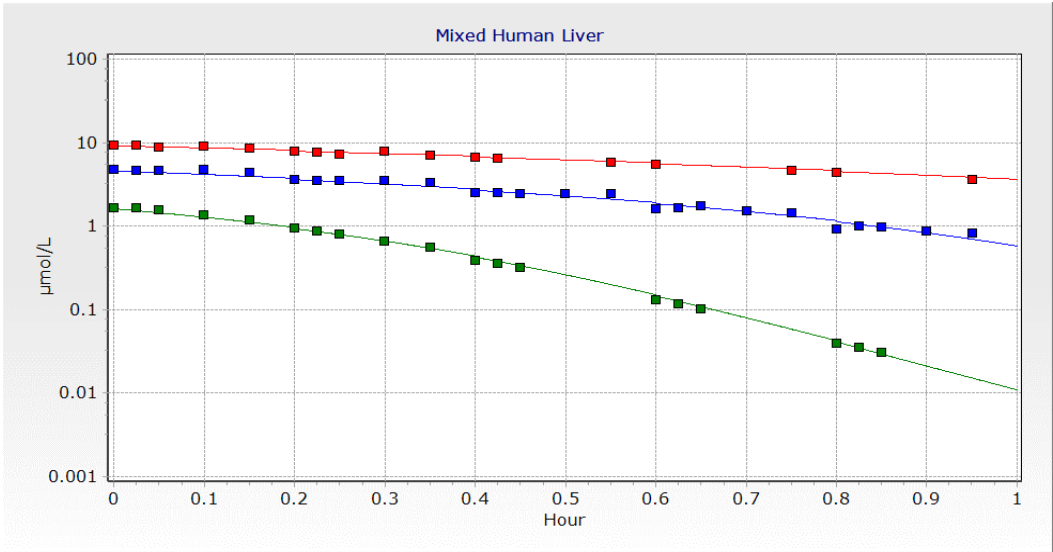



# Human Liver

```
gelman.diag(x, autoburnin=FALSE)
Potential scale reduction factors:
```

|            | Point est. | Upper CI |
|------------|------------|----------|
| Likelihood | 1          | 1        |
| Vmax       | 1          | 1        |
| Km         | 1          | 1        |

```
Multivariate psrf
```

```
1
>
>
> summary(x1)
```

```
Iterations = 1:10000
Thinning interval = 1
Number of chains = 1.00E+00
Sample size per chain = 1.00E+04
```

1 Empirical mean and standard deviation for each variable  
plus standard error of the mean:

|            | Mean    | SD       | Naive SE | Time-series SE |
|------------|---------|----------|----------|----------------|
| Likelihood | 0.0752  | 0.007174 | 7.17E-05 | 1.19E-04       |
| Vmax       | -2.959  | 0.016627 | 1.66E-04 | 8.95E-04       |
| Km         | -1.1505 | 0.036055 | 3.61E-04 | 0.001957       |

2 Quantiles for each variable:

|            | 2.50%    | 25%      | 50%      | 75%       | 97.50%    |
|------------|----------|----------|----------|-----------|-----------|
| Likelihood | 0.06268  | 0.07012  | 0.07455  | 0.07973   | 0.09091   |
| Vmax       | -2.99176 | -2.96974 | -2.95915 | -2.95E+00 | -2.93E+00 |
| Km         | -1.22304 | -1.1739  | -1.14973 | -1.13E+00 | -1.08E+00 |

```
> summary(x2)
```

```
Iterations = 1:10000
Thinning interval = 1
Number of chains = 1
Sample size per chain = 10000
```

1 Empirical mean and standard deviation for each variable  
plus standard error of the mean:

|            | Mean    | SD       | Naive SE | Time-series SE |
|------------|---------|----------|----------|----------------|
| Likelihood | 0.07538 | 0.007224 | 7.22E-05 | 1.19E-04       |

# Human Liver

```
Vmax      -2.95972  0.017136  1.71E-04  9.60E-04
Km        -1.15194  0.037421  3.74E-04  0.002065
```

2 Quantiles for each variable:

```
      2.50%    25%    50%    75%    97.50%
Likelihood    0.06297  0.07038  0.07471  0.07973  0.09108
Vmax          -2.99237 -2.97153 -2.95972 -2.94869 -2.92415
Km            -122.25%  -118%   -115%   -113%  -107.53%
```

```
> summary(x3)
```

```
Iterations      =      1:10000
Thinning        interval =      1
Number          of chains =      1
Sample          size per chain =      10000
```

1 Empirical mean and standard deviation for each variable  
plus standard error of the mean:

```
      Mean    SD      Naive   SE      Time-series SE
Likelihood    0.07531  0.007241  7.24E-05  1.22E-04
Vmax          -2.95863  0.016767  1.68E-04  9.04E-04
Km            -1.1494  0.036705  3.67E-04  0.002025
```

2 Quantiles for each variable:

```
      2.50%    25%    50%    75%    97.50%
Likelihood    0.0629  0.07017  7.46E-02  0.07974  0.09132
Vmax          -2.9931 -2.96951 -2.95856 -2.94749 -2.9265
Km            -1.2237 -1.17323 -1.14921 -1.12577 -1.07885
```



Human Lung

Mixed Human Lung Microsomes

| Log |    |                 | Mean   | 95% CI |       |
|-----|----|-----------------|--------|--------|-------|
|     | KF | L/hr/mg protein | -31.23 | -57.38 | -7.84 |

Mixed

| EXP |    |                 | Mean     | 95% CI   |          |
|-----|----|-----------------|----------|----------|----------|
|     | KF | L/hr/mg protein | 2.73E-14 | 1.20E-25 | 3.92E-04 |

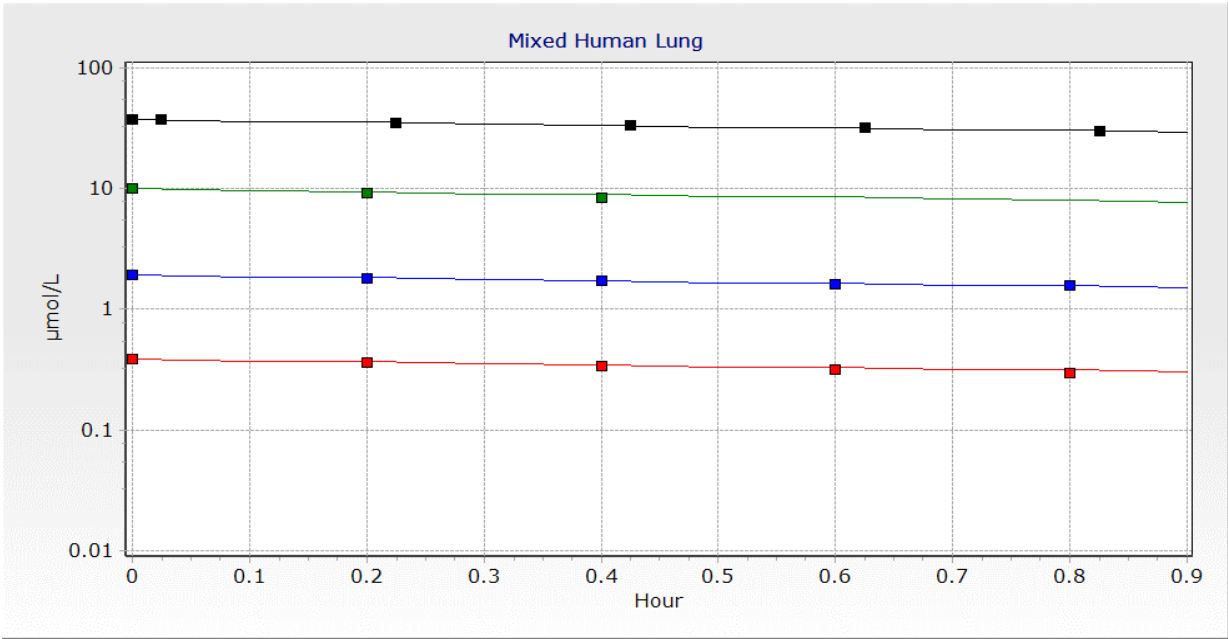

## Human Lung

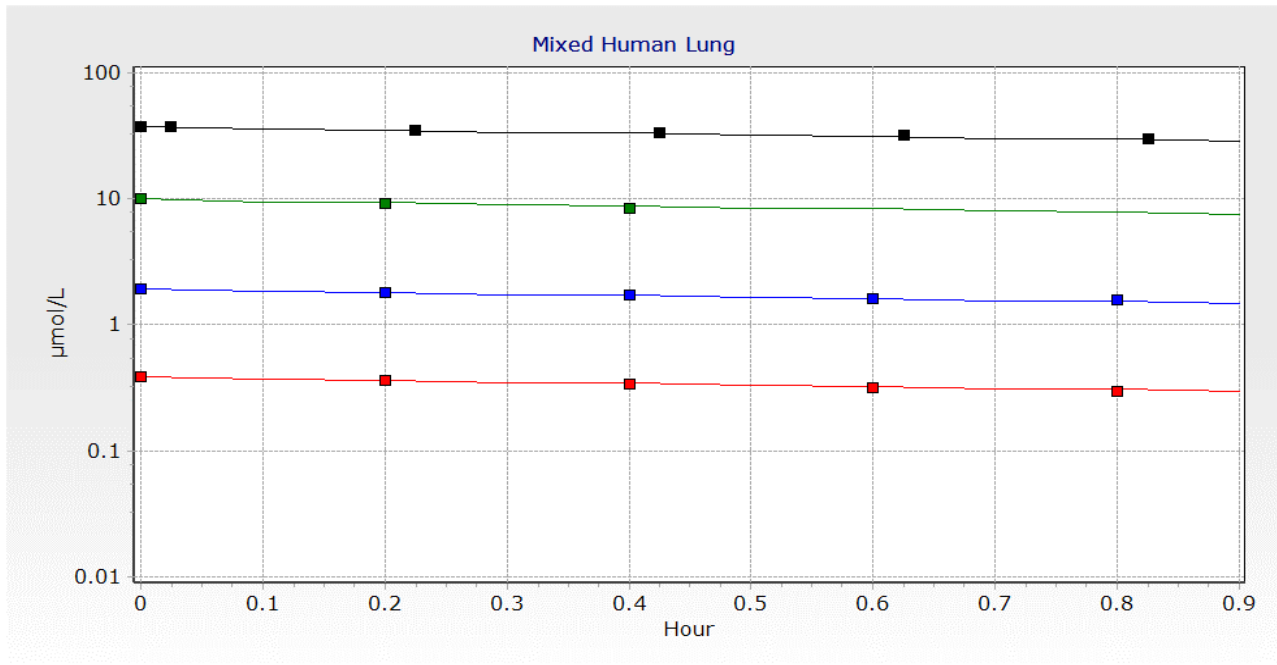

# Human Lung

```
gelman.diag(x, autoburnin=TRUE)
Potential scale reduction factors:
```

|            | Point est. | Upper CI |
|------------|------------|----------|
| Likelihood | 1          | 1        |
| KF         | 1          | 1        |

```
Multivariate psrf
```

```
1
```

```
>
```

```
> summary(x1)
```

|            |                |         |          |  |
|------------|----------------|---------|----------|--|
| Iterations | =              | 1:10000 |          |  |
| Thinning   | interval       | =       | 1.00E+00 |  |
| Number     | of chains      | =       | 1.00E+00 |  |
| Sample     | size per chain | =       | 10000    |  |

1 Empirical mean and standard deviation for each variable  
plus standard error of the mean:

|            | Mean     | SD       | Naive    | SE       | Time-series SE |
|------------|----------|----------|----------|----------|----------------|
| Likelihood | 0.034    | 1%       | 6.13E-05 | 1.08E-04 |                |
| KF         | -31.2314 | 14.69496 | 1.47E-01 | 3.65E-01 |                |

2 Quantiles for each variable:

|            | 2.50%    | 25%      | 50%      | 75%      | 97.50%  |
|------------|----------|----------|----------|----------|---------|
| Likelihood | 0.02433  | 0.02964  | 0.03306  | 0.03716  | 0.0483  |
| KF         | -57.3782 | -43.1335 | -31.0057 | -18.5737 | -7.8447 |

```
> summary(x2)
```

|            |                |         |          |  |
|------------|----------------|---------|----------|--|
| Iterations | =              | 1:10000 |          |  |
| Thinning   | interval       | =       | 1.00E+00 |  |
| Number     | of chains      | =       | 1        |  |
| Sample     | size per chain | =       | 10000    |  |

1 Empirical mean and standard deviation for each variable  
plus standard error of the mean:

|            | Mean     | SD       | Naive    | SE       | Time-series SE |
|------------|----------|----------|----------|----------|----------------|
| Likelihood | 0.0336   | 0.00595  | 5.95E-05 | 1.01E-04 |                |
| KF         | -31.5983 | 14.85774 | 1.49E-01 | 3.44E-01 |                |

2 Quantiles for each variable:

# Human Lung

|            | 2.50%   | 25%      | 50%      | 75%      | 97.50%  |
|------------|---------|----------|----------|----------|---------|
| Likelihood | 0.0244  | 0.02933  | 0.03282  | 0.03691  | 0.04755 |
| KF         | -57.854 | -44.0332 | -31.2451 | -18.9358 | -7.93   |

> summary(x3)

```

Iterations = 1:10000
Thinning interval = 1
Number of chains = 1
Sample size per chain = 10000

```

1 Empirical mean and standard deviation for each variable  
plus standard error of the mean:

|            | Mean     | SD      | Naive SE | Time-series SE |
|------------|----------|---------|----------|----------------|
| Likelihood | 0.03377  | 0.0059  | 5.90E-05 | 1.01E-04       |
| KF         | -31.1458 | 14.9204 | 1.49E-01 | 3.53E-01       |

2 Quantiles for each variable:

|            | 2.50%    | 25%      | 50%      | 75%      | 97.50%  |
|------------|----------|----------|----------|----------|---------|
| Likelihood | 0.02438  | 0.02958  | 0.03305  | 0.0371   | 0.0476  |
| KF         | -57.5813 | -43.3802 | -31.0608 | -18.1723 | -7.8754 |

MCMC Mean Parameters

|              |              |                           | Liver |        |       | Lung    |          |         | Kidney       |         |         |
|--------------|--------------|---------------------------|-------|--------|-------|---------|----------|---------|--------------|---------|---------|
|              |              |                           | Mean  | 95% CI |       | Mean    | 95% CI   |         | Mean         | 95% CI  |         |
| Kg estimated | Male Mouse   | Vmax (μmol/hr/mg protein) | 0.23  | 0.22   | 0.24  | 0.13    | 0.12     | 0.15    | 0.010        | 0.008   | 0.013   |
|              |              | Km (μmol/L)               | 0.61  | 0.54   | 0.69  | 1.72    | 1.51     | 2.02    | 0.58         | 0.42    | 0.79    |
|              |              |                           |       |        |       |         |          |         |              |         |         |
|              | Female Mouse | Vmax (μmol/hr/mg protein) | 0.108 | 0.090  | 0.13  | 0.028   | 0.020    | 0.039   |              |         |         |
|              |              | Km (μmol/L)               | 0.46  | 0.31   | 0.69  | 2.91    | 1.99     | 4.24    |              |         |         |
|              |              | KF (L/hr/mg protein)      |       |        |       |         |          |         | 0.00043      | 0.00019 | 0.00071 |
|              | Male Rat     | Vmax (μmol/hr/mg protein) | 0.071 | 0.068  | 0.074 |         |          |         | 0.0041       | 0.0031  | 0.0054  |
|              |              | Km (μmol/L)               | 0.35  | 0.32   | 0.38  |         |          |         | 0.84         | 0.61    | 1.18    |
|              |              | KF (L/hr/mg protein)      |       |        |       | 0.00087 | 0.000056 | 0.0172  |              |         |         |
|              | Female Rat   | Vmax (μmol/hr/mg protein) | 0.072 | 0.058  | 0.087 |         |          |         | 0.0035       | 0.0027  | 0.0046  |
|              |              | Km (μmol/L)               | 0.74  | 0.57   | 0.96  |         |          |         | 0.55         | 0.40    | 0.76    |
|              |              | KF (L/hr/mg protein)      |       |        |       | 0.00041 | 0.000052 | 0.00493 |              |         |         |
|              | Human        | Vmax (μmol/hr/mg protein) | 0.052 | 0.050  | 0.054 | 7.4E-05 |          |         | Not Measured |         |         |
|              |              | Km (μmol/L)               | 0.32  | 0.29   | 0.34  | 3.2E-01 |          |         |              |         |         |
|              |              | KF (L/hr/mg protein)      |       |        |       | 2.7E-14 | 1.2E-25  | 3.9E-04 |              |         |         |

| Summary In Vivo Parameters |  |              |                         | Liver | Lung   | Kidney |  |
|----------------------------|--|--------------|-------------------------|-------|--------|--------|--|
|                            |  | Male Mouse   | Vmax (mg/hr/BW^0.75)    | 17.50 | 0.76   | 0.120  |  |
|                            |  |              | Km (mg/L)               | 0.054 | 0.15   | 0.051  |  |
|                            |  |              |                         |       |        |        |  |
|                            |  | Female Mouse | Vmax (mg/hr/BW^0.75)    | 8.22  | 0.16   |        |  |
|                            |  |              | Km (mg/L)               | 0.041 | 0.26   |        |  |
|                            |  |              | KFKIC (L/hr/kg BW^0.75) |       |        | 0.058  |  |
|                            |  |              |                         |       |        |        |  |
|                            |  | Male Rat     | Vmax (mg/hr/BW^0.75)    | 7.30  |        | 0.038  |  |
|                            |  |              | Km (mg/L)               | 0.031 |        | 0.074  |  |
|                            |  |              | KFLUC (L/hr/kg BW^0.75) |       | 0.069  |        |  |
|                            |  |              |                         |       |        |        |  |
|                            |  | Female Rat   | Vmax (mg/hr/BW^0.75)    | 6.66  |        | 0.029  |  |
|                            |  |              | Km (mg/L)               | 0.066 |        | 0.049  |  |
|                            |  |              | KFLUC (L/hr/kg BW^0.75) |       | 0.030  |        |  |
|                            |  |              |                         |       |        |        |  |
|                            |  | Human        | Vmax (mg/hr/BW^0.75)    | 13.66 | 0.0029 |        |  |
|                            |  |              | Km (mg/L)               | 0.028 | 0.028  |        |  |

Revised Scaling

|                                                             |                             |                                         |                                      |                                         |                                         |                                                                                                                                                    |                                                         |                                                                               |                    |
|-------------------------------------------------------------|-----------------------------|-----------------------------------------|--------------------------------------|-----------------------------------------|-----------------------------------------|----------------------------------------------------------------------------------------------------------------------------------------------------|---------------------------------------------------------|-------------------------------------------------------------------------------|--------------------|
| Scaling factors<br>for average<br>adults in each<br>species | Parameter                   | BW (kg)                                 | Liver fractional weight (VLC)        | Lung fractional<br>weight (VLUC)        | Kidney fractional<br>weight (VKC)       | Liver mg<br>microsomal<br>protein per g liver<br>(MPPGL)                                                                                           | Lung mg<br>microsomal<br>protein per g<br>lung (MPPGLU) | Kidney mg<br>microsomal<br>protein per g<br>kidney (MPPGK)                    | MW                 |
|                                                             | B6C3F1<br>Mouse<br>(Female) | 0.04                                    | 0.0549                               | 0.0073                                  | 0.0167                                  | 35                                                                                                                                                 | 20                                                      | 18                                                                            | 88.53650           |
|                                                             | B6C3F1<br>Mouse<br>(Male)   | 0.04                                    | 0.0549                               | 0.0073                                  | 0.0167                                  | 35                                                                                                                                                 | 20                                                      | 18                                                                            | g/mol =<br>ug/umol |
|                                                             | F344 Rat<br>(Female)        | 0.265                                   | 0.0366                               | 0.005                                   | 0.0073                                  | 40                                                                                                                                                 | 20                                                      | 18                                                                            |                    |
|                                                             | F344 Rat<br>(Male)          | 0.407                                   | 0.0366                               | 0.005                                   | 0.0073                                  | 40                                                                                                                                                 | 20                                                      | 18                                                                            |                    |
|                                                             | Average<br>Human            | 70                                      | 0.0257                               | 0.0076                                  | 0.0044                                  | 40                                                                                                                                                 | 20                                                      | 11                                                                            |                    |
|                                                             | Reference                   | Brown et al, 1997 (page<br>415 in text) | Brown et al, 1997 (Tables 4, 5, & 7) | Brown et al, 1997<br>(Tables 4, 5, & 7) | Brown et al, 1997<br>(Tables 4, 5, & 7) | Medinsky et al., 1994<br>for mouse; Medinsky<br>et al., 1994 and<br>Houston and Galetin,<br>2008 for rat; Barter et<br>al., 2008 2007 for<br>human | Medinsky et al., 1994<br>for all species                | Yoon et al., 2007 for<br>mouse and rat;<br>Scotcher et al., 2017<br>for human |                    |

References

1. Brown et al., 1997, Toxicol. Ind. Health, July-Aug;13(4):407-84. Review. PubMed PMID:9249929
2. Barter et al., Drug Metab Dispos. 2008 Dec;36(12):2405-9. doi: 10.1124/dmd.108.021311. Epub 2008 Sep 5. PubMed PMID: 18775982.
3. Himmelstein et al., Toxicol Sci. 2004b May;79(1):28-37. Epub 2004 Feb 19. PubMed PMID: 14976335.
4. Houston and Galetin, Curr Drug Metab. 2008 Nov;9(9):940-51. Review. PubMed PMID: 18991591.
5. Scotcher et al., Drug Metab Dispos. 2017 May;45(5):556-568. doi: 10.1124/dmd.117.075242. Epub 2017 Mar 7. PubMed PMID: 28270564; PubMed Central PMCID: PMC5399648.

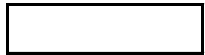



|                    |                       |                |                         |                               |                   |                                   |
|--------------------|-----------------------|----------------|-------------------------|-------------------------------|-------------------|-----------------------------------|
| Biological Scaling | Vmaxc<br>(mg/h/kg)    | In Vitro Value | x Scaling factor        | x Tissue weight               | /BW^0.75          | x MW = In vivo parameter (unit in |
| Female Mouse       | Values                | 0.11           | 35                      | 8.31                          | 92.87             | 8.22                              |
| LIVER              | Scaling & calculation |                | x MPPGL (mg MP/g liver) | x BW (kg) x VLC x 1000 (g/kg) | /BW^0.75          | x MW (ug/umol)/1000 (ug/mg)       |
|                    | Unit                  | umol/h/mg MP   | umol/h/g liver          | umol/h                        | umol/h/kg BW^0.75 | mg/h/kg BW^0.75                   |

|                    |                            |                |                         |                               |                   |                                               |
|--------------------|----------------------------|----------------|-------------------------|-------------------------------|-------------------|-----------------------------------------------|
| Biological Scaling | Vmaxc<br>(mg/h/kg BW^0.75) | In Vitro Value | x Scaling factor        | x Tissue weight               | /BW^0.75          | x MW = In vivo parameter (unit in PBPK model) |
| Male Mouse         | Values                     | 0.23           | 35                      | 17.68                         | 197.64            | 17.50                                         |
| LIVER              | Scaling & calculation      |                | x MPPGL (mg MP/g liver) | x BW (kg) x VLC x 1000 (g/kg) | /BW^0.75          | x MW (ug/umol)/1000 (ug/mg)                   |
|                    | Unit                       | umol/h/mg MP   | umol/h/g liver          | umol/h                        | umol/h/kg BW^0.75 | mg/h/kg BW^0.75                               |

|                    |                            |                |                         |                               |                   |                                               |
|--------------------|----------------------------|----------------|-------------------------|-------------------------------|-------------------|-----------------------------------------------|
| Biological Scaling | Vmaxc<br>(mg/h/kg BW^0.75) | In Vitro Value | x Scaling factor        | x Tissue weight               | /BW^0.75          | x MW = In vivo parameter (unit in PBPK model) |
| Female Rat         | Values                     | 0.072          | 40                      | 27.79                         | 75.23             | 6.66                                          |
| LIVER              | Scaling & calculation      |                | x MPPGL (mg MP/g liver) | x BW (kg) x VLC x 1000 (g/kg) | /BW^0.75          | x MW (ug/umol)/1000 (ug/mg)                   |
|                    | Unit                       | umol/h/mg MP   | umol/h/g liver          | umol/h                        | umol/h/kg BW^0.75 | mg/h/kg BW^0.75                               |

| Biological<br>Scaling | Vmaxc<br>(mg/h/kg<br>BW^0.75) | In Vitro Value  | x Scaling<br>factor        | x Tissue weight                  | /BW^0.75             | x MW = In vivo<br>parameter (unit in<br>PBPK model) |
|-----------------------|-------------------------------|-----------------|----------------------------|----------------------------------|----------------------|-----------------------------------------------------|
| Male Rat              | Values                        | 0.071           | 40                         | 42.03                            | 82.47                | 7.30                                                |
| LIVER                 | Scaling &<br>calculation      |                 | x MPPGL (mg<br>MP/g liver) | x BW (kg) x VLC x<br>1000 (g/kg) | /BW^0.75             | x MW<br>(ug/umol)/1000<br>(ug/mg)                   |
|                       | Unit                          | umol/h/mg<br>MP | umol/h/g<br>liver          | umol/h                           | umol/h/kg<br>BW^0.75 | mg/h/kg BW^0.75                                     |

| Biological<br>Scaling | Vmaxc<br>(mg/h/kg<br>BW^0.75) | In Vitro Value  | x Scaling<br>factor        | x Tissue weight                  | /BW^0.75             | x MW = In vivo<br>parameter (unit in<br>PBPK model) |
|-----------------------|-------------------------------|-----------------|----------------------------|----------------------------------|----------------------|-----------------------------------------------------|
| Mixed gender<br>Human | Values                        | 0.052           | 40                         | 3732.62                          | 154.24               | 13.66                                               |
| LIVER                 | Scaling &<br>calculation      |                 | x MPPGL (mg<br>MP/g liver) | x BW (kg) x VLC x<br>1000 (g/kg) | /BW^0.75             | x MW<br>(ug/umol)/1000<br>(ug/mg)                   |
|                       | Unit                          | umol/h/mg<br>MP | umol/h/g<br>liver          | umol/h                           | umol/h/kg<br>BW^0.75 | mg/h/kg BW^0.75                                     |

Alternat Scaling



|                    |                       |                |                         |                                |                   |                             |
|--------------------|-----------------------|----------------|-------------------------|--------------------------------|-------------------|-----------------------------|
| Biological Scaling | VmaxLUC (mg/h/kg)     | In Vitro Value | x Scaling factor        | x Tissue weight                | /BW^0.75          | x MW = In vivo              |
| Female Mouse       | Values                | 0.028          | 20                      | 0.163                          | 1.82              | 0.16                        |
| LUNG               | Scaling & calculation |                | x MPPGLU (mg MP/g lung) | x BW (kg) X VLUC X 1000 (g/kg) | /BW^0.75          | x MW (ug/umol)/1000 (ug/mg) |
|                    | Unit                  | umol/h/mg MP   | umol/h/g lung           | umol/h                         | umol/h/kg BW^0.75 | mg/h/kg BW^0.75             |

|                    |                       |                |                          |                               |                |  |
|--------------------|-----------------------|----------------|--------------------------|-------------------------------|----------------|--|
| Biological Scaling | KFKIC (L/h/kg)        | In Vitro Value | x Scaling factor         | x Tissue weight               | /BW^0.75       |  |
| Female Mouse       | Values                | 0.0004310      | 18                       | 0.00518                       | 0.058          |  |
| KIDNEY             | Scaling & calculation |                | x MPPGK (mg MP/g kidney) | x BW (kg) x VKC x 1000 (g/kg) | /BW^0.75       |  |
|                    | Unit                  | L/h/mg MP      | L/hr/g kidney            | L/hr                          | L/h/kg BW^0.75 |  |

|                    |                           |                |                         |                                |                   |                                               |
|--------------------|---------------------------|----------------|-------------------------|--------------------------------|-------------------|-----------------------------------------------|
| Biological Scaling | VmaxLUC (mg/h/kg BW^0.75) | In Vitro Value | x Scaling factor        | x Tissue weight                | /BW^0.75          | x MW = In vivo parameter (unit in PBPK model) |
| Male Mouse         | Values                    | 0.13           | 20                      | 0.765                          | 8.55              | 0.76                                          |
| LUNG               | Scaling & calculation     |                | x MPPGLU (mg MP/g lung) | x BW (kg) X VLUC X 1000 (g/kg) | /BW^0.75          | x MW (ug/umol)/1000 (ug/mg)                   |
|                    | Unit                      | umol/h/mg MP   | umol/h/g lung           | umol/h                         | umol/h/kg BW^0.75 | mg/h/kg BW^0.75                               |

|                    |                            |                                            |                          |                               |                   |                                               |
|--------------------|----------------------------|--------------------------------------------|--------------------------|-------------------------------|-------------------|-----------------------------------------------|
| Biological Scaling | VmaxKIDc (mg/h/kg BW^0.75) | In vitro value (Yang et al. 2012, Table 3) | x Scaling factor         | x Tissue weight               | /BW^0.75          | x MW = In vivo parameter (unit in PBPK model) |
| Male Mouse         | Values                     | 0.010                                      | 18                       | 0.122                         | 1.36              | 0.12                                          |
| KIDNEY             | Scaling & calculation      |                                            | x MPPGK (mg MP/g kidney) | x BW (kg) x VKC x 1000 (g/kg) | /BW^0.75          | x MW (ug/umol)/1000 (ug/mg)                   |
|                    | Unit                       | umol/h/mg MP                               | umol/h/g kidney          | umol/h                        | umol/h/kg BW^0.75 | mg/h/kg BW^0.75                               |

|                    |                        |                |                         |                                          |              |  |
|--------------------|------------------------|----------------|-------------------------|------------------------------------------|--------------|--|
| Biological Scaling | KFLUC (L/h/kg BW^0.75) | In Vitro Value | x Scaling factor        | x Tissue weight                          | /BW^0.75     |  |
| Female Rat         | Values                 | 0.00041        | 20                      | 0.011                                    | 0.030        |  |
| LUNG               | Scaling & calculation  |                | x MPPGLU (mg MP/g lung) | x scaling factor x BW*VLUC X 1000 (g/kg) | /BW^0.75     |  |
|                    | Unit                   | L/h/mg MP      |                         | L/h                                      | L/hr/BW^0.75 |  |

|                    |                            |                |                          |                               |                   |                                               |
|--------------------|----------------------------|----------------|--------------------------|-------------------------------|-------------------|-----------------------------------------------|
| Biological Scaling | VmaxKIDc (mg/h/kg BW^0.75) | In Vitro Value | x Scaling factor         | x Tissue weight               | /BW^0.75          | x MW = In vivo parameter (unit in PBPK model) |
| Female Rat         | Values                     | 0.00352        | 18                       | 0.122                         | 0.33              | 0.029                                         |
| KIDNEY             | Scaling & calculation      |                | x MPPGK (mg MP/g kidney) | x BW (kg) x VKC x 1000 (g/kg) | /BW^0.75          | x MW (ug/umol)/1000 (ug/mg)                   |
|                    | Unit                       | umol/h/mg MP   | umol/h/g kidney          | umol/h                        | umol/h/kg BW^0.75 | mg/h/kg BW^0.75                               |

|                    |                        |                |                         |                                          |              |
|--------------------|------------------------|----------------|-------------------------|------------------------------------------|--------------|
| Biological Scaling | KFLUC (L/h/kg BW^0.75) | In Vitro Value | x Scaling factor        | x Tissue weight                          | /BW^0.75     |
| Male Rat           | Values                 | 0.00087        | 20                      | 0.035                                    | 0.069        |
| LUNG               | Scaling & calculation  |                | x MPPGLU (mg MP/g lung) | X Scaling Factor X BW*VLUC X 1000 (g/kg) | /BW^0.75     |
|                    | Unit                   | L/h/mg MP      |                         | L/h                                      | L/hr/BW^0.75 |

|                    |                            |                |                          |                               |                   |                                               |
|--------------------|----------------------------|----------------|--------------------------|-------------------------------|-------------------|-----------------------------------------------|
| Biological Scaling | VmaxKIDc (mg/h/kg BW^0.75) | In Vitro Value | x Scaling factor         | x Tissue weight               | /BW^0.75          | x MW = In vivo parameter (unit in PBPK model) |
| Male Rat           | Values                     | 0.00406        | 18                       | 0.217                         | 0.43              | 0.038                                         |
| KIDNEY             | Scaling & calculation      |                | x MPPGK (mg MP/g kidney) | x BW (kg) x VKC x 1000 (g/kg) | /BW^0.75          | x MW (ug/umol)/1000 (ug/mg)                   |
|                    | Unit                       | umol/h/mg MP   | umol/h/g kidney          | umol/h                        | umol/h/kg BW^0.75 | mg/h/kg BW^0.75                               |

|                    |                       |                |                         |                                          |              |
|--------------------|-----------------------|----------------|-------------------------|------------------------------------------|--------------|
| Biological Scaling | KFLUC (L/h/kg BW)     | In Vitro Value | x Scaling factor        | x Tissue weight                          | /BW^0.75     |
| Mixed gender Human | Values                | 2.73E-14       | 20                      | 2.91E-10                                 | 1.20E-11     |
| LUNG               | Scaling & calculation |                | x MPPGLU (mg MP/g lung) | X Scaling Factor X BW*VLUC X 1000 (g/kg) | /BW^0.75     |
|                    | Unit                  | L/h/mg MP      |                         | L/h                                      | L/hr/BW^0.75 |

|                    |                                                              |
|--------------------|--------------------------------------------------------------|
| Biological Scaling | in vitro metabolic constant not reported in Yang et al. 2012 |
| Mixed gender Human |                                                              |
| Kidney             |                                                              |
|                    |                                                              |

|                       |                                 |                |                            |                                   |                      |                                                           |
|-----------------------|---------------------------------|----------------|----------------------------|-----------------------------------|----------------------|-----------------------------------------------------------|
| Biological<br>Scaling | VmaxLUc<br>(mg/h/kg<br>BW^0.75) | In Vitro Value | x Scaling factor           | x Tissue weight                   | /BW^0.75             | x MW = In<br>vivo<br>parameter<br>(unit in PBPK<br>model) |
| Male Mouse            | Values                          | 7.42E-05       | 20                         | 7.89E-01                          | 3.26E-02             | 2.89E-03                                                  |
| LUNG                  | Scaling &<br>calculation        |                | x MPPGLU (mg<br>MP/g lung) | x BW (kg) X VLUC<br>X 1000 (g/kg) | /BW^0.75             | x MW<br>(ug/umol)/10<br>00 (ug/mg)                        |
|                       | Unit                            | umol/h/mg MP   | umol/h/g lung              | umol/h                            | umol/h/kg<br>BW^0.75 | mg/h/kg<br>BW^0.75                                        |

Uses IVIVE scaling approach from the Yoon report. (human lung Vmax calculated using approach from methyl)

## Dose metrics using parameters derived with MCMC estimate of Kgl: 0.22 L/hr

**TSTOP**      **336 hrs**      Amt. Metab. = mg/day/g tissue

**Exposure:**    **6 hr/day 5 days/week**

**Revised parameters from MCMC of In Vitro data with flux limitation included**

| <b>Female Mouse Initial Parm</b> |             |             |             | <b>Concentration<br/>Specific BW (kg)</b> |
|----------------------------------|-------------|-------------|-------------|-------------------------------------------|
|                                  | Amt. Metab. | Amt. Metab. | Amt. Metab. |                                           |
| ppm                              | Liver       | Lung        | Kidney      |                                           |
| 12.8                             | 1.14        | 1.00        | 0.066       | 0.040                                     |
| 32                               | 2.91        | 1.58        | 0.17        | 0.040                                     |
| 80                               | 7.57        | 2.15        | 0.45        | 0.036                                     |

Amt. Metab. = mg/day/g tissue

| <b>Human Initial Parm</b> |             |             |             |
|---------------------------|-------------|-------------|-------------|
|                           | Amt. Metab. | Amt. Metab. | Amt. Metab. |
| ppm                       | Liver       | Lung        | Kidney      |
| 12.8                      | 0.30        | 0.0072      | -           |
| 32                        | 0.74        | 0.010       | -           |
| 80                        | 1.85        | 0.015       | -           |

Amt. Metab. = mg/day/g tissue

**Human Continuous Exposure (24 hr/day)**

| <b>Human Parm Continuous Exposure</b> |             |             |             |
|---------------------------------------|-------------|-------------|-------------|
|                                       | Amt. Metab. | Amt. Metab. | Amt. Metab. |
| PPM                                   | Liver       | Lung        | Kidney      |
| 2.80E-04                              | 3.56E-05    | 3.36E-06    | -           |
| 1.00E-03                              | 1.27E-04    | 1.20E-05    | -           |
| 1.00E-02                              | 1.27E-03    | 1.19E-04    | -           |
| 1.00E-01                              | 1.27E-02    | 1.16E-03    | -           |
| 1.00E+00                              | 1.28E-01    | 9.00E-03    | -           |
| 2.00E+00                              | 2.56E-01    | 1.44E-02    | -           |
| 4.00E+00                              | 5.13E-01    | 2.06E-02    | -           |
| 6.00E+00                              | 7.71E-01    | 2.40E-02    | -           |
| 8.00E+00                              | 1.03E+00    | 2.61E-02    | -           |
| 1.00E+01                              | 1.29E+00    | 2.76E-02    | -           |
| 1.20E+01                              | 1.54E+00    | 2.87E-02    | -           |
| 1.40E+01                              | 1.80E+00    | 2.96E-02    | -           |
| 1.60E+01                              | 2.06E+00    | 3.02E-02    | -           |
| 1.80E+01                              | 2.32E+00    | 3.07E-02    | -           |
| 2.00E+01                              | 2.58E+00    | 3.12E-02    | -           |

# Dose Metics

|          |          |          |   |
|----------|----------|----------|---|
| 2.20E+01 | 2.83E+00 | 3.15E-02 | - |
| 2.40E+01 | 3.09E+00 | 3.19E-02 | - |
| 2.60E+01 | 3.35E+00 | 3.21E-02 | - |
| 2.80E+01 | 3.61E+00 | 3.24E-02 | - |
| 3.00E+01 | 3.87E+00 | 3.26E-02 | - |
| 3.20E+01 | 4.13E+00 | 3.28E-02 | - |
| 3.40E+01 | 4.38E+00 | 3.29E-02 | - |
| 3.60E+01 | 4.64E+00 | 3.31E-02 | - |
| 3.80E+01 | 4.90E+00 | 3.32E-02 | - |
| 4.00E+01 | 5.16E+00 | 3.33E-02 | - |
| 4.20E+01 | 5.41E+00 | 3.34E-02 | - |
| 4.40E+01 | 5.67E+00 | 3.35E-02 | - |
| 4.60E+01 | 5.93E+00 | 3.36E-02 | - |
| 4.80E+01 | 6.19E+00 | 3.37E-02 | - |
| 5.00E+01 | 6.45E+00 | 3.38E-02 | - |
| 5.20E+01 | 6.70E+00 | 3.39E-02 | - |
| 5.40E+01 | 6.96E+00 | 3.39E-02 | - |
| 5.60E+01 | 7.22E+00 | 3.40E-02 | - |
| 5.80E+01 | 7.48E+00 | 3.40E-02 | - |
| 6.00E+01 | 7.74E+00 | 3.41E-02 | - |
| 6.20E+01 | 7.99E+00 | 3.42E-02 | - |
| 6.40E+01 | 8.25E+00 | 3.42E-02 | - |
| 6.60E+01 | 8.51E+00 | 3.42E-02 | - |
| 6.80E+01 | 8.77E+00 | 3.43E-02 | - |
| 7.00E+01 | 9.02E+00 | 3.43E-02 | - |
| 7.20E+01 | 9.28E+00 | 3.44E-02 | - |
| 7.40E+01 | 9.54E+00 | 3.44E-02 | - |
| 7.60E+01 | 9.80E+00 | 3.44E-02 | - |
| 7.80E+01 | 1.01E+01 | 3.45E-02 | - |
| 8.00E+01 | 1.03E+01 | 3.45E-02 | - |
| 8.20E+01 | 1.06E+01 | 3.45E-02 | - |
| 8.40E+01 | 1.08E+01 | 3.46E-02 | - |
| 8.60E+01 | 1.11E+01 | 3.46E-02 | - |
| 8.80E+01 | 1.13E+01 | 3.46E-02 | - |
| 9.00E+01 | 1.16E+01 | 3.46E-02 | - |
| 9.20E+01 | 1.19E+01 | 3.47E-02 | - |
| 9.40E+01 | 1.21E+01 | 3.47E-02 | - |
| 9.60E+01 | 1.24E+01 | 3.47E-02 | - |
| 9.80E+01 | 1.26E+01 | 3.47E-02 | - |
| 1.00E+02 | 1.29E+01 | 3.48E-02 | - |



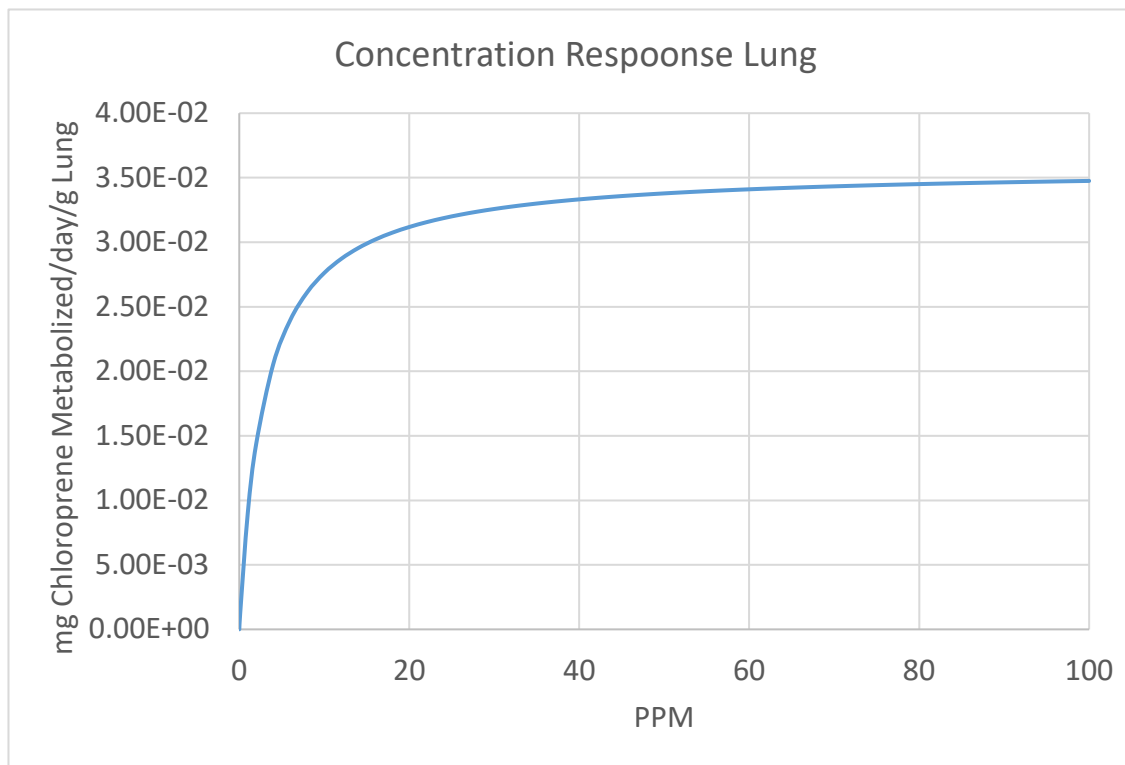

Supplement: Supplementary file 2 [file 1]
