# Supplementary material
Source: publisher figshare collection journal article supplement (https://tandf.figshare.com/articles/dataset/_/11761056)
Supplement: Supplementary file 1 [file 1]

## E. Chloroprene PBPK Model Equations

#Chloroprene PBPK Model

#Translated from the acslX model presented in Yang et al. 2012

#By Jerry Campbell 2019

States = {

AI ,

AX ,

AM ,

AMLU ,

AMK ,

ALU ,

AL ,

AK ,

AS ,

AR ,

AF

};

Outputs = {

MASBAL ,

CLU ,

CL ,

CK ,

CS ,

CR ,

CF ,

CV ,

CVLUM ,

ppm ,

AMP ,

AMPLU ,

AMPK ,

cvl ,

qcbal ,

vbal

};

Inputs = {EXPPULSE};

#BODY WEIGHT (kg)

BW = 0.03 ; # Body weight (kg)

#### #SPECIAL FLOW RATES

QPC = 29.1 ; # Unscaled Alveolar Vent (L/h/kg<sup>0.75</sup>)  
QCC = 20.1 ; # Unscaled Cardiac Output (L/h/kg<sup>0.75</sup>)

#### #FRACTIONAL BLOOD FLOWS TO TISSUES

QLC = 0.161 ; # Flow to Liver as % Cardiac Output (unitless)  
QFC = 0.07 ; # Flow to Fat as % Cardiac Output (unitless)  
QSC = 0.159 ; # Flow to Slow as % Cardiac Output (unitless)  
QKC = 0.09 ; # Flow to Kidney as % Cardiac Output (unitless)

#### #FRACTIONAL VOLUMES OF TISSUES

VLC = 0.055 ; # Volume Liver as % Body Weight (unitless)  
VLUC = 0.0073 ; # Volume Lung as % Body Weight (unitless)  
VFC = 0.1 ; # Volume Fat as % Body Weight (unitless)  
VRC = 0.08098 ; # Volume Rapid Perfused as % Body Weight (unitless)  
VSC = 0.384 ; # Volume Slow Perfused as % Body Weight (unitless)  
VKC = 0.0167 ; # Volume Kidney as % Body Weight (unitless)

#### #PARTITION COEFFICIENTS PARENT

PL = 1.26 ; # Liver/Blood Partition Coefficient (unitless)  
PLU = 2.38 ; # Lung/Blood Partition Coefficient (unitless)  
PF = 17.35 ; # Fat/Blood Partition Coefficient (unitless)  
PS = 0.59 ; # Slow/Blood Partition Coefficient (unitless)  
PR = 1.76 ; # Rapid/Blood Partition Coefficient (unitless)  
PB = 7.83 ; # Blood/Air Partition Coefficient (unitless)  
PK = 1.76 ; # Kidney/Blood Partition Coefficient (unitless)

#### #KINETIC CONSTANTS

MW = 88.5 ; # Molecular weight (g/mol)

#### # Metabolism in Liver

VMAXC = 7.95 ; # Scaled VMax for Oxidative Pathway:Liver (mg/h/BW<sup>0.75</sup>)  
KM = 0.041 ; # Km for Oxidative Pathway:Liver (mg/L)

#### # Metabolism in Lung

VMAXCLU = 0.18 ; # Scaled VMax for Oxidative Pathway:Lung (mg/h/BW<sup>0.75</sup>)  
KMLU = 0.26 ; # Km for Oxidative Pathway:Lung (mg/L)  
KFLUC = 0.0 ; # Pseudo-first order clearance in lung (Km unidentifiable) (L/hr/BW<sup>0.75</sup>)

#### # Metabolism in Kidney

VMAXCKid = 0.0 ; # Scaled VMax for Oxidative Pathway:Kidney (mg/h/BW<sup>0.75</sup>)  
KMKD = 0.0 ; # Km for Oxidative Pathway:Kidney  
KFKIC = 0.079 ; # Pseudo-first order clearance in kidney (Km unidentifiable) (L/hr/BW<sup>0.75</sup>)

#### #DOSING INFORMATION

TSTOP = 7.0 ; # Dosing stop time

CONC = 13.0 ; # Initial concentration (ppm)

Dynamics {

#### # Scaled parameters

QC = QCC\*pow(BW,0.75) ; #Cardiac output

QP = QPC\*pow(BW,0.75) ; #Alveolar ventilation

QL = QLC\*QC ; #Liver blood flow

QF = QFC\*QC ; #Fat blood flow

QS = QSC\*QC ; #Slowly-perf tissue blood flow

QK = QKC\*QC ; #Kidney tissue blood flow

QRC = 1-QLC-QKC-QFC-QSC ; #Rapidly Perfused tissues

QR = QRC\*QC ; #Rapidly-perf tissue blood flow

VL = VLC\*BW ; #Liver volume

VLU = VLUC\*BW ; #Lung volume

VF = VFC\*BW ; #Fat tissue volume

VS = VSC\*BW ; #Slowly-perfused tissue volume

VR = VRC\*BW ; #Richly-perfused tissue volume

VK = VKC\*BW ; #kidney tissue volume

ROBC = 1 - VLC - VLUC - VFC - VSC - VRC - VKC ; #Rest of body un-perfused tissue for Monte Carlo  
sims

#### # METABOLISM

VMAX = VMAXC\*pow(BW,0.75) ; #Maximum rate of metabolism-Liver (mg/hr/kg-BW)

VMAXLU = VMAXCLU\*pow(BW,0.75) ; #Maximum rate of metabolism-Lung (mg/hr/kg-BW)

KFLU = KFLUC\*pow(BW,0.75) ;

VMAXKD = VMAXCKid\*pow(BW,0.75) ; #Maximum rate of metabolism-Kidney (mg/hr/kg-BW)

KFKI = KFKIC\*pow(BW,0.75) ;

#### # Exposure Control (mg/L)

CIX = CONC\*MW/24450 ;

CI = CIX \*EXPPULSE ;

#### # Tissue Venous Concentrations (mg/L)

CVLU = ALU/(VLU\*PLU) ;

CVL = AL/(VL\*PL) ;

$CVK = AK/(VK*PK) ;$   
 $CVS = AS/(VS*PS) ;$   
 $CVR = AR/(VR*PR) ;$   
 $CVF = AF/(VF*PF) ;$

# Concentration in Pulmonary/Arterial and venous blood Compartments (mg/L)  
 $CPU = (QP*CI + (QF*CVF + QL*CVL + QS*CVS + QR*CVR + QK*CVK))/(QP/PB + QC) ;$   
 $CX = CPU/PB ;$   
 $CV = (QF*CVF + QL*CVL + QS*CVS + QR*CVR + QK*CVK)/QC ;$   
 $CPUM = CPU*1000/MW ;$   
 $RAI = QP*CI ;$   
 $dt(AI) = RAI ;$   
 $RAX = QP*CX ;$   
 $dt(AX) = RAX ;$

# Amount metabolized in Liver (mg)  
 $RAM = VMAX*CVL/(KM + CVL) ;$   
 $dt(AM) = RAM ;$

# Amount metabolized in Lung (mg)  
 $RAMLU = VMAXLU*CVLU/(KMLU + CVLU) + KFLU*CVLU ;$   
 $dt(AMLU) = RAMLU ;$

# Amount metabolized in Kidney (mg)  
 $RAMK = VMAXKD*CVK/(KMKD + CVK) + KFKI*CVK ;$   
 $dt(AMK) = RAMK ;$

# Amount in Lung Compartment (mg)  
 $RALU = QC*(CPU - CVLU) - RAMLU ;$   
 $dt(ALU) = RALU ;$

# Amount in Liver Compartment (mg)  
 $RAL = QL*(CVLU - CVL) - RAM ;$   
 $dt(AL) = RAL ;$

# Amount in Kidney Compartment (mg)  
 $RAK = QK*(CVLU - CVK) - RAMK ;$   
 $dt(AK) = RAK ;$

# Amount in Slowly Perfused Tissues (mg)  
 $RAS = QS*(CVLU - CVS) ;$   
 $dt(AS) = RAS ;$

# Amount in Rapidly Perfused Tissues (mg)

```
RAR = QR*(CVLU -CVR) ;  
dt(AR) = RAR ;
```

```
# Amount in Fat Compartment (mg)
```

```
RAF = QF*(CVLU - CVF) ;  
dt(AF) = RAF ;
```

```
} # End of Dynamics
```

```
CalcOutputs {
```

```
# Mass-balance
```

```
MASBAL = AI - AX - (AL+AM+AMLU+ALU+AK+AMK+AS+AR+AF) ;
```

```
#Tissue Concentrations (mg/L)
```

```
CLU = ALU/VLU ;
```

```
CL = AL/VL ;
```

```
CK = AK/VK ;
```

```
CS = AS/VS ;
```

```
CR = AR/VR ;
```

```
CF = AF/VF ;
```

```
#Concentrations for plots
```

```
CVLUM = CVLU*1000/MW ; #(umol/L)
```

```
#Dose metrics
```

```
ppm = CONC ;
```

```
AMP = ((AM*1000/MW)/(VL*1000))/(TSTOP/24) ;
```

```
AMPLU = ((AMLU*1000/MW)/(VLU*1000))/(TSTOP/24) ;
```

```
AMPK = ((AMK*1000/MW)/(VK*1000))/(TSTOP/24) ;
```

```
cvl = CVL ;
```

```
#Blood Flow balance
```

```
qcbal = QC - QL - QF - QS - QK - QR ;
```

```
#Tissue Volume balance
```

```
vbal = BW*(1-ROBC) - VL - VLU - VF - VS - VK - VR ;
```

```
} # End of CalcOutputs
```

```
End.
```
