# Supplementary material
Source: publisher figshare collection journal article supplement (https://tandf.figshare.com/articles/dataset/_/11761056)
Supplement: Supplementary file 4 [file 1]

## A. Supplemental Tables

| Table S-1: Physiological Parameters for PBPK Model |              |                        |       |        |                                                                  |        |        |                                                                  |        |                                                                |
|----------------------------------------------------|--------------|------------------------|-------|--------|------------------------------------------------------------------|--------|--------|------------------------------------------------------------------|--------|----------------------------------------------------------------|
| Parameter                                          | Abbreviation | Units                  | Mice  |        | Source                                                           | Rats   |        | Source                                                           | Humans | Source                                                         |
|                                                    |              |                        | Male  | Female |                                                                  | Male   | Female |                                                                  |        |                                                                |
| Body Weight                                        | BW           | kg                     | 0.04  | 0.04   | NTP (1998) time and survival weighted average BW control animals | 0.407  | 0.256  | NTP (1998) time and survival weighted average BW control animals | 70     | USEPA 1988                                                     |
| Alveolar Ventilation                               | QPC          | L/h/kg <sup>0.75</sup> | 29.1  | 29.1   | Brown et al. 1997 (Table 31)                                     | 22.4   | 22.4   | Brown et al. 1997 (Table 31)                                     | 24.0   | Clewell et al. 2001 (Table 1)                                  |
| Cardiac Output                                     | QCC          | L/h/kg <sup>0.75</sup> | 20.1  | 20.1   | Marino et al. 2006 (QPC/QCC = 1.45)                              | 18.7   | 18.7   | Brown et al. 1997 (Table 22)                                     | 16.5   | Clewell et al. 2001 (Table 1)                                  |
| FRACTIONAL BLOOD FLOWS TO TISSUES                  |              |                        |       |        |                                                                  |        |        |                                                                  |        |                                                                |
| Flow to Liver as fraction Cardiac Output           | QLC          | unitless               | 0.161 | 0.161  | Brown et al. 1997 (Table 23)                                     | 0.183  | 0.183  | Brown et al. 1997 (Table 23)                                     | 0.227  | Brown et al. 1997 (Table 23)                                   |
| Flow to Fat as fraction Cardiac Output             | QFC          | unitless               | 0.07  | 0.07   | Brown et al. 1997 (Table 23; Same as rat value)                  | 0.07   | 0.07   | Brown et al. 1997 (Table 23)                                     | 0.052  | Brown et al. 1997 (Table 23)                                   |
| Flow to Spleen as fraction Cardiac Output          | QSC          | unitless               | 0.159 | 0.159  | Brown et al. 1997 (Table 23); Same as that reported for muscle   | 0.278  | 0.278  | Brown et al. 1997 (Table 23); Same as that reported for muscle   | 0.191  | Brown et al. 1997 (Table 23); Same as that reported for muscle |
| Flow to Kidney as fraction Cardiac Output          | QKC          | unitless               | 0.09  | 0.09   | Brown et al. 1997 (Table 23)                                     | 0.14   | 0.14   | Brown et al. 1997 (Table 23)                                     | 0.175  | Brown et al. 1997 (Table 23)                                   |
| FRACTIONAL VOLUMES OF TISSUES                      |              |                        |       |        |                                                                  |        |        |                                                                  |        |                                                                |
| Volume Liver as fraction Body Weight               | VLC          | unitless               | 0.055 | 0.055  | Brown et al. 1997 (Table 4)                                      | 0.0366 | 0.0366 | Brown et al. 1997 (Table 5)                                      | 0.0257 | Brown et al. 1997 (Table 7)                                    |

| Table S-1: Physiological Parameters for PBPK Model |              |          |         |         |                                                                                                                                            |         |         |                                                                                                                                            |        |                                                                                                                                            |
|----------------------------------------------------|--------------|----------|---------|---------|--------------------------------------------------------------------------------------------------------------------------------------------|---------|---------|--------------------------------------------------------------------------------------------------------------------------------------------|--------|--------------------------------------------------------------------------------------------------------------------------------------------|
| Parameter                                          | Abbreviation | Units    | Mice    |         | Source                                                                                                                                     | Rats    |         | Source                                                                                                                                     | Humans | Source                                                                                                                                     |
|                                                    |              |          | Male    | Female  |                                                                                                                                            | Male    | Female  |                                                                                                                                            |        |                                                                                                                                            |
| Volume Lung as fraction Body Weight                | VLUC         | unitless | 0.0073  | 0.0073  | Brown et al. 1997 (Table 4)                                                                                                                | 0.005   | 0.005   | Brown et al. 1997 (Table 5)                                                                                                                | 0.0076 | Brown et al. 1997 (Table 7)                                                                                                                |
| Volume Fat as fraction Body Weight                 | VFC          | unitless | 0.1     | 0.1     | Brown et al. 1997 (Table 10)                                                                                                               | 0.1     | 0.1     | Brown et al. 1997 (Table 13)                                                                                                               | 0.27   | Brown et al. 1997 (Table 14); Average of total male and female                                                                             |
| Volume Rapid Perfused as fraction Body Weight      | VRC          | unitless | 0.08098 | 0.08098 | Brown et al. 1997 (Table 4); Sum of adrenals, brain, stomach, small intestine, large intestine, heart, lungs, pancreas, spleen and thyroid | 0.04644 | 0.04644 | Brown et al. 1997 (Table 5); Sum of adrenals, brain, stomach, small intestine, large intestine, heart, lungs, pancreas, spleen and thyroid | 0.0533 | Brown et al. 1997 (Table 7); Sum of adrenals, brain, stomach, small intestine, large intestine, heart, lungs, pancreas, spleen and thyroid |
| Volume Slow Perfused as fraction Body Weight       | VSC          | unitless | 0.384   | 0.384   | Brown et al. 1997 (Table 4); Same as that reported for muscle                                                                              | 0.4     | 0.4     | Brown et al. 1997 (Table 5); Same as that reported for muscle                                                                              | 0.4    | Brown et al. 1997 (Table 7); Same as that reported for muscle                                                                              |
| Volume Kidney as fraction Body Weight              | VKC          | unitless | 0.0167  | 0.0167  | Brown et al. 1997 (Table 4)                                                                                                                | 0.0073  | 0.0073  | Brown et al. 1997 (Table 5)                                                                                                                | 0.0044 | Brown et al. 1997 (Table 7)                                                                                                                |

| <b>Table S-2: Partition Coefficients for PBPK Model</b> |             |             |               |
|---------------------------------------------------------|-------------|-------------|---------------|
|                                                         | <b>Mice</b> | <b>Rats</b> | <b>Humans</b> |
| Blood:Air                                               | 7.83        | 7.35        | 4.54          |
| Lung:Blood                                              | 2.38        | 1.85        | 2.94          |
| Liver:Blood                                             | 1.26        | 1.58        | 2.37          |
| Fat:Blood                                               | 17.35       | 16.99       | 28.65         |
| Muscle:Blood <sup>a</sup>                               | 0.59        | 0.60        | 1.00          |
| Kidney:Blood <sup>b</sup>                               | 1.76        | 2.29        | 2.67          |

<sup>a</sup> used for slowly perfused tissues;

<sup>b</sup> used for rapidly perfused tissues

| <b>Table S-3: In Vitro Metabolism Parameters</b> |                                  |                                       |                                                         |
|--------------------------------------------------|----------------------------------|---------------------------------------|---------------------------------------------------------|
| <b>Sex &amp; Species</b>                         | <b>Parameter</b>                 | <b>Source</b>                         |                                                         |
|                                                  |                                  | <b>Yang et al. 2012<br/>MCMC Mean</b> | <b>This Analysis<br/>Mean (95% Confidence Interval)</b> |
| Female mouse                                     | Vmax, liver (μmol/h/mg protein)  | 0.13                                  | 0.11 (0.090 - 0.13)                                     |
|                                                  | Vmax, lung (μmol/h/mg protein)   | 0.03                                  | 0.028 (0.020 – 0.039)                                   |
|                                                  | Vmax, kidney (μmol/h/mg protein) | 0.004                                 | NA                                                      |
|                                                  | Km, liver (μmol/L)               | 0.88                                  | 0.46 (0.31 – 0.69)                                      |
|                                                  | Km, lung (μmol/L)                | 2.82                                  | 2.91 (1.99 – 4.24)                                      |
|                                                  | Km, kidney (μmol/L)              | 176.11                                | NA                                                      |
|                                                  | KF, kidney (L/h/mg protein)      | NA                                    | 0.00043 (0.00019 – 0.00071)                             |
| Male mouse                                       | Vmax, liver (μmol/h/mg protein)  | 0.26                                  | 0.23 (0.22 – 0.24)                                      |
|                                                  | Vmax, lung (μmol/h/mg protein)   | 0.14                                  | 0.13 (0.12 – 0.15)                                      |
|                                                  | Vmax, kidney (μmol/h/mg protein) | 0.01                                  | 0.010 (0.008 – 0.013)                                   |
|                                                  | Km, liver (μmol/L)               | 1.34                                  | 0.61 (0.54 – 0.69)                                      |
|                                                  | Km, lung (μmol/L)                | 2.22                                  | 1.72 (1.51 – 2.02)                                      |
|                                                  | Km, kidney (μmol/L)              | 0.77                                  | 0.58 (0.42 – 0.79)                                      |
|                                                  | KF, kidney (L/h/mg protein)      | NA                                    | NA                                                      |
| Female rat                                       | Vmax, liver (μmol/h/mg protein)  | 0.09                                  | 0.072 (0.058 – 0.087)                                   |
|                                                  | Vmax, lung (μmol/h/mg protein)   | NA                                    | NA                                                      |
|                                                  | Vmax, kidney (μmol/h/mg protein) | 0.003                                 | 0.0035 (0.0027 – 0.0046)                                |
|                                                  | Km, liver (μmol/L)               | 0.56                                  | 0.74 (0.57 – 0.96)                                      |
|                                                  | Km, lung (μmol/L)                | NA                                    | NA                                                      |
|                                                  | Km, kidney (μmol/L)              | 0.60                                  | 0.55 (0.40 – 0.76)                                      |
|                                                  | KF, lung (L/h/mg protein)        | 0.00096                               | 0.00041 (0.000052 – 0.00049)                            |
| Male rat                                         | Vmax, liver (μmol/h/mg protein)  | 0.10                                  | 0.071 (0.068 – 0.074)                                   |

|        |                                              |         |                             |
|--------|----------------------------------------------|---------|-----------------------------|
|        | Vmax, lung ( $\mu\text{mol/h/mg}$ protein)   | NA      | NA                          |
|        | Vmax, kidney ( $\mu\text{mol/h/mg}$ protein) | 0.003   | 0.0041 (0.0031 – 0.0054)    |
|        | Km, liver ( $\mu\text{mol/L}$ )              | 0.56    | 0.35 (0.32 – 0.38)          |
|        | Km, lung ( $\mu\text{mol/L}$ )               | NA      | NA                          |
|        | Km, kidney ( $\mu\text{mol/L}$ )             | 0.76    | 0.84 (0.61 – 1.18)          |
|        | KF, lung (L/h/mg protein)                    | 0.00128 | 0.00087 (0.000056 – 0.0172) |
| Humans | Vmax, liver ( $\mu\text{mol/h/mg}$ protein)  | 0.05    | 0.052 (0.050 – 0.054)       |
|        | Vmax, lung ( $\mu\text{mol/h/mg}$ protein)   | NA      | NA                          |
|        | Vmax, kidney ( $\mu\text{mol/h/mg}$ protein) | NA      | NA                          |
|        | Km, liver ( $\mu\text{mol/L}$ )              | 0.45    | 0.32 (0.29 – 0.34)          |
|        | Km, lung ( $\mu\text{mol/L}$ )               | NA      | NA                          |
|        | Km, kidney ( $\mu\text{mol/L}$ )             | NA      | NA                          |
|        | KF, lung (L/h/mg protein)                    | 0.00032 | 2.7E-14 (1.2E-25 – 3.9E-04) |

**Table S-4: Metabolism Parameters for PBPK Model**

| Sex & Species | Parameter                    | Source            |                           |
|---------------|------------------------------|-------------------|---------------------------|
|               |                              | Yang et al. 2012  | This Analysis (Table S-3) |
| Female Mouse  | VmaxC, liver (mg/h/kg**3/4)  | 8.88              | 8.22                      |
|               | VmaxC, lung (mg/h/kg**3/4)   | 0.11              | 0.16                      |
|               | VmaxC, kidney (mg/h/kg**3/4) | 0.03              | NA                        |
|               | Km, liver (mg /L)            | 0.08              | 0.041                     |
|               | Km, lung (mg /L)             | 0.25              | 0.26                      |
|               | KM, kidney (mg /L)           | 9.59              | NA                        |
|               | KF, kidney (L/h/kg**3/4)     | NA                | 0.058                     |
| Male Mouse    | VmaxC, liver (mg/h/kg**3/4)  | 18.54             | 17.5                      |
|               | VmaxC, lung (mg/h/kg**3/4)   | 0.6               | 0.76                      |
|               | VmaxC, kidney (mg/h/kg**3/4) | 0.078             | 0.12                      |
|               | Km, liver (mg /L)            | 0.12              | 0.054                     |
|               | Km, lung (mg /L)             | 0.2               | 0.15                      |
|               | KM, kidney (mg /L)           | 0.068             | 0.051                     |
|               | KF, kidney (L/h/kg**3/4)     | NA                | NA                        |
| Female Rat    | VmaxC, liver (mg/h/kg**3/4)  | 9.37              | 6.66                      |
|               | VmaxC, lung (mg/h/kg**3/4)   | NA                | NA                        |
|               | VmaxC, kidney (mg/h/kg**3/4) | 0.018             | 0.029                     |
|               | Km, liver (mg /L)            | 0.09              | 0.066                     |
|               | Km, lung (mg /L)             | NA                | NA                        |
|               | KM, kidney (mg /L)           | 0.053             | 0.049                     |
|               | KF, lung (L/h/kg**3/4)       | 0.16 <sup>a</sup> | 0.030                     |
| Male Rat      | VmaxC, liver (mg/h/kg**3/4)  | 9.48              | 7.30                      |
|               | VmaxC, lung (mg/h/kg**3/4)   | NA                | NA                        |
|               | VmaxC, kidney (mg/h/kg**3/4) | 0.018             | 0.038                     |
|               | Km, liver (mg /L)            | 0.05              | 0.031                     |
|               | Km, lung (mg /L)             | NA                | NA                        |
|               | KM, kidney (mg /L)           | 0.067             | 0.074                     |
|               | KF, lung (L/h/kg**3/4)       | 0.15 <sup>a</sup> | 0.069                     |
| Humans        | VmaxC, liver (mg/h/kg**3/4)  | 20.4              | 13.66                     |
|               | VmaxC, lung (mg/h/kg**3/4)   | NA                | 0.0029                    |
|               | VmaxC, kidney (mg/h/kg**3/4) | NA                | NA                        |
|               | Km, liver (mg /L)            | 0.04              | 0.028                     |
|               | Km, lung (mg /L)             | NA                | 0.028                     |
|               | KM, kidney (mg /L)           | NA                | NA                        |
|               | KF, lung (L/h/kg**3/4)       | 0.05 <sup>a</sup> | NA                        |

<sup>a</sup> (L/h/kg)

**Table S-5: Plethysmography Data**

| Pulmonary Function Data Protocol 07039 Summary |                 |                   | Exposure #1                 |
|------------------------------------------------|-----------------|-------------------|-----------------------------|
| Exposure                                       | Frequency (BPM) | Tidal Volume (ml) | Minute Ventilation (ml/min) |
| 0ppm                                           | Average         | Average           | Average                     |
| Animal 1                                       | 193.5           | 0.247             | 48.4                        |
| Animal 2                                       | 168.2           | 0.284             | 47.2                        |
| Animal 3                                       | 251.9           | 0.212             | 51.6                        |
| Animal 4                                       | 201.7           | 0.311             | 61.6                        |
| Average                                        | 203.8           | 0.264             | 52.2                        |
| Stdev                                          | 35.1            | 0.043             | 6.5                         |

| Pulmonary Function Data Protocol 07039 Summary |                 |                   | Exposure #2                 |
|------------------------------------------------|-----------------|-------------------|-----------------------------|
| Exposure                                       | Frequency (BPM) | Tidal Volume (ml) | Minute Ventilation (ml/min) |
| 13 ppm                                         | Average         | Average           | Average                     |
| Animal 20                                      | 221.9           | 0.261             | 57.6                        |
| Animal 21                                      | 221.0           | 0.264             | 57.6                        |
| Animal 22                                      | 140.9           | 0.224             | 32.0                        |
| Animal 23                                      | 131.2           | 0.218             | 28.9                        |
| Average                                        | 178.7           | 0.242             | 44.0                        |
| Stdev                                          | 49.4            | 0.024             | 15.7                        |

| Pulmonary Function Data Protocol 07039 Summary |                 |                   | Exposure #3                 |
|------------------------------------------------|-----------------|-------------------|-----------------------------|
| Exposure                                       | Frequency (BPM) | Tidal Volume (ml) | Minute Ventilation (ml/min) |
| 32 ppm                                         | Average         | Average           | Average                     |
| Animal 54                                      | 253.3           | 0.269             | 66.1                        |
| Animal 55                                      | 225.0           | 0.269             | 59.4                        |
| Animal 56                                      | 249.8           | 0.282             | 69.5                        |
| Animal 57                                      | 235.2           | 0.293             | 67.9                        |
| Average                                        | 240.8           | 0.278             | 65.7                        |
| Stdev                                          | 13.1            | 0.012             | 4.4                         |

| Pulmonary Function Data Protocol 07039 Summary |                 |                   | Exposure #4                 |
|------------------------------------------------|-----------------|-------------------|-----------------------------|
| Exposure                                       | Frequency (BPM) | Tidal Volume (ml) | Minute Ventilation (ml/min) |
| 90 ppm                                         | Average         | Average           | Average                     |
| Animal 88                                      | 216.3           | 0.276             | 59.4                        |
| Animal 89                                      | 178.4           | 0.242             | 43.2                        |
| Animal 90                                      | 217.9           | 0.277             | 59.8                        |
| Animal 91                                      | 166.2           | 0.278             | 45.8                        |
| Average                                        | 194.7           | 0.268             | 52.0                        |
| Stdev                                          | 26.4            | 0.017             | 8.8                         |

| <b>Table S-6: Arterial Blood Concentrations</b> |                     |                    |             |
|-------------------------------------------------|---------------------|--------------------|-------------|
| <b>13 ppm Exposure</b>                          |                     |                    |             |
| <b>Time point</b>                               | <b>Average [CD]</b> | <b>Std Dev. CD</b> | <b>RSD%</b> |
| Control                                         | 0                   | 0                  | 0%          |
| 0.5 hours                                       | 1.03                | 0.18               | 17%         |
| 3 hours                                         | 1.93                | 0.80               | 41%         |
| 6 hours                                         | 1.58                | 0.35               | 22%         |
| 5 min post exposure                             | 0.66                | 0.07               | 101%        |
| 10 min post exposure                            | 0.70                | 0.11               | 157%        |
| 15 min post exposure                            | 0                   | 0                  | 0%          |
| <b>32 ppm Exposure</b>                          |                     |                    |             |
| <b>Time point</b>                               | <b>Average [CD]</b> | <b>Std Dev. CD</b> | <b>RSD%</b> |
| Control                                         | 0                   | 0                  | 0%          |
| 0.5 hours                                       | 1.68                | 0.70               | 42%         |
| 3 hours                                         | 2.90                | 1.15               | 40%         |
| 6 hours                                         | 2.44                | 1.24               | 51%         |
| 5 min post exposure                             | 0.61                | 0.22               | 35%         |
| 10 min post exposure                            | 0.18                | 0.09               | 48%         |
| 15 min post exposure                            | 0.30                | 0.23               | 78%         |
| <b>90 ppm Exposure</b>                          |                     |                    |             |
| <b>Time point</b>                               | <b>Average [CD]</b> | <b>Std Dev. CD</b> | <b>RSD%</b> |
| Control                                         | 0                   | 0                  | 0%          |
| 0.5 hours                                       | 6.41                | 1.83               | 29%         |
| 3 hours                                         | 7.33                | 3.52               | 48%         |
| 6 hours                                         | 8.00                | 1.02               | 13%         |
| 5 min post exposure                             | 1.71                | 0.78               | 46%         |
| 10 min post exposure                            | 0.92                | 0.33               | 35%         |
| 15 min post exposure                            | 0.68                | 0.15               | 23%         |
